# Supplementary material
Source: PubMed Central journal article supplement (PMC3704165)
Supplement: NIHMS483873-supplement-Suppl__Info.pdf [file NIHMS483873-supplement-Suppl__Info.pdf]

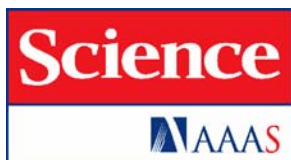

## Supporting Online Material for

### **Mutations in *BCKD-kinase* Lead to a Potentially Treatable Form of Autism with Epilepsy**

Gaia Novarino,\* Paul El-Fishawy, Hulya Kayserili, Nagwa A. Meguid, Eric M. Scott, Jana Schroth, Jennifer L. Silhavy, Majdi Kara, Rehab O. Khalil, Tawfeg Ben-Omran, A. Gulhan Ercan-Sencicek, Adel F. Hashish, Stephan J. Sanders, Abha R. Gupta, Hebatalla S. Hashem, Dietrich Matern, Stacey Gabriel, Larry Sweetman, Yasmeen Rahimi, Robert A. Harris, Matthew W. State, Joseph G. Gleeson\*

\*To whom correspondence should be addressed. E-mail: gnovarino@ucsd.edu (G.N.); jogleeson@ucsd.edu (J.G.G.)

Published 6 September 2012 on *Science Express*  
DOI: 10.1126/science.1224631

#### **This PDF file includes:**

Materials and Methods

Supplementary Text

Figs. S1 to S10

Tables S1 to S10

References

## **MATERIALS AND METHODS**

### **Human subjects**

Patients were enrolled according to standard local practice in approved human subjects protocols at the University of California and Yale University.

### **Linkage and homozygosity analysis**

DNA was extracted from peripheral blood leukocytes using salt extraction. For family 1435 all the informative members were genotyped with the Infinium iSelect24 mapping panel (Center for Inherited Disease Research) and analyzed with easyLINKAGE-Plus (22), software to generate multipoint LOD scores for assembling exclusion maps. For families 558 and 18 blocks of homozygosity were determined by HomozygosityMapper (3).

### **Whole-Exome Sequencing and variant analysis**

WES was performed using solution hybrid SureSelect reagents (Agilent, Mountain View, CA) and sequenced on an Illumina GAIIx or HiSeq2000 instrument (23).

For probands of families 558 and 1435 the sequence reads were aligned to the human genome (hg19), genetic variants were delineated using the Genome Analysis ToolKit (GATK 1.1) software and SAMTools (v1.4-r985) algorithms, for both SNPs and Indels (24), then sequentially filtered for variants that were: 1] in coding regions and/or splice sites, 2] non-synonymous, 3] not found out of Hardy-Weinberg equilibrium with the disease frequency in control populations, 4] homozygous, 5] and within linkage intervals or in blocks of homozygosity. The remaining variants were ranked by type of mutation (indels > nonsense >

missense), amino acid conservation across species and protein damage prediction based upon location of the mutation in a specialized protein domain.

For Family 18 the sequence reads obtained were aligned to the human genome (hg18) using BWA; duplicate reads were removed and SNVs and indels were called using SAMtools. Shared homozygous segments of the affected individuals were detected using PLINK software version 1.06. The variants were annotated for novelty and compared with dbSNP (build 132) and control samples analyzed by whole-exome sequencing experiments performed by our human genomics groups. Variants were analyzed against the RefSeq hg18 gene definitions, a list that includes 18,933 specific genes. Where multiple isoforms gave varying results the one most likely to lead to protein disruption was chosen. Filtering and ranking of variants proceeded as described above for families 558 and 1435.

### **Sanger sequencing**

Primers were designed using the Primer3 program and tested for specificity using ENSEMBL's BLAST software. PCR products were treated using Exonuclease I (Fermentas) and Shrimp Alkaline Phosphatase (USB Corporation) and sequenced using the Big Dye terminator cycle sequencing Kit v.3.1 (Applied Biosystems) on an ABI 3100 DNA analyzer (Applied Biosystems). The sequence data were analyzed using Sequencher 4.9 (Gene Codes).

### **Protein modeling**

The structural model of the mutant rat BCKDK was derived from the structure of the rat wildtype protein (PDB ID codes 1gfv) (4) using Protein Local Optimization Program (PLOP) from the Matt Jacobson Lab and modified with PYMOL

(<http://pymol.sourceforge.net/>).

### **Expression analysis**

Total RNA was extracted with RNeasy Mini Kit (Qiagen), in accordance with the manufacturer's instructions. A total of 2µg RNA was transcribed to cDNA using the SuperScriptIII cDNA kit (Invitrogen) with random hexamers. For RT-PCR primers were designed to amplify the entire BCKDK transcript. For quantitative real time PCR primers were designed using Primer Express Software (Applied Biosystems) on the exon-exon junction and tested for specificity using NCBI's BLAST software. Real-time PCR was performed using the Syber Green PCR master mix (Applied Biosystems) and the ABI 7900 Sequence Detection System (Applied Biosystems). Data were normalized to TBP (TATA box-binding protein) and analyzed by the comparative CT method (25).

Mouse Gene Expression 12X135K Arrays (NimbleGen) were used for gene expression analysis of wildtype and *Bckdk* knockout mouse cortices.

Second strand synthesis and hybridization to the NimbleGen array were performed following the NimbleGen expression array user's guide.

Probe normalized expression values were calculated using the NimbleScan software (Nimblegen). Raw chip images were processed to derive intensity values and normalization was performed using Robust Multichip Average (RMA) analysis (Bolstad et al. 2003). Subsequent analysis was performed using the Bioconductor project (<http://www.bioconductor.org>). Normalized intensities were grouped in wildtype and knockout and fit to a linear model to shrink pooled variances. An empirical bayes methodology was used to calculate moderated t-

statistical and p-values. Probes were considered significant if p-values met a threshold of  $\leq 0.05$ . Heatmaps were generated using heatmap2 command from the gplots package. QC analysis was performed on all data to check for array artifacts or a bimodal distribution of intensities. Arrays that failed these QC metrics were removed from the comparison. Gene annotation enrichment was performed using DAVID (<http://david.abcc.ncifcrf.gov/>).

### **Western Blot**

Right hemispheres of mouse brains or cell pellets were lysed in ice-cold RIPA buffer supplemented with protease inhibitor cocktail (Complete, Roche). After 1 hour of incubation at 4 °C the lysate was centrifuged at 14,000 rpm for 15 minutes. The protein concentration of the supernatant was measured using the BioRad protein assay method (BioRad). For the dephosphorylation experiment protein cell lysates were incubated with calf intestine phosphatase (CIP) (New England Biolabs) according to the manufacturer's instructions prior to gel electrophoresis. For the Western blot 30  $\mu$ g proteins were separated in 10% SDS-PAGE gels and transferred to a PVDF membrane using a Bio-Rad MicroCell Western blotting apparatus. The membranes were blocked with 5% milk in 1x TBS-T, and blotted with primary antibody overnight at 4 °C. Detection used a peroxidase-coupled anti-IgG antibody (Pierce) and an enhanced chemiluminescence substrate (Thermo Scientific Pierce ECL). The following primary antibodies were used: rabbit anti-BCKDK (1:500, Acris or 1:1000, Sigma), rabbit anti-BCKDH-E1 $\alpha$  (1:100, (10)), rabbit anti-BCKDH-E1 $\alpha$ -pSer293 (1:1000, (10)), mouse anti-tubulin (1:1000, Sigma), rabbit anti-GAPDH (1:1000,

Millipore).

### **Plasma amino acid analysis**

Patient blood samples were collected under fasting or non-fasting conditions (as labeled) in sodium heparin or potassium EDTA treated tubes. After collection the blood was centrifuged for 10 minutes at 1,000-2,000 x g using a refrigerated centrifuge and plasma was immediately frozen and shipped on dry ice. Plasma amino acids were analyzed at the Baylor Research Institute (USA) and at Bioscientia Laboratories (Germany) by HPLC on an amino acid analyzer or at Mayo Clinic (USA) by liquid chromatography-tandem mass spectrometry (LC-MS/MS). Due to the Libyan revolution dry ice shipment was not available in Libya, for family 1435. Therefore, blood was collected on Guthrie cards and analyzed by LC-MS/MS and flow injection analysis-tandem mass spectrometry (FIA-MS/MS).

### **Brain amino acids analysis**

The left hemisphere of mouse brain was collected, weighed and immediately homogenized in 1 ml of ice-cold RIPA buffer in the presence of protease inhibitors. The tissue was disrupted using a glass homogenizer, transferred into a collecting tube, and left on ice for 1 hour. The homogenate was centrifuged for 40 minutes at 100,000 X g at 4 °C, the supernatant was collected and deproteinized by the addition of an equal volume of a solution of 8% (wt/vol) 5-sulfosalicylic acid and stored at -70°C until assayed for amino acid concentrations. At the time of the assay, the samples were thawed, mixed, centrifuged for 30 min at 5,000 Xg at 4°C to remove the precipitated protein and assessed by High Performance

Liquid Chromatography (HPLC). Amino acid concentrations were normalized using the wet tissue weight.

### **Cell culture**

Mutant and control fibroblasts were generated from explants of dermal biopsies following informed consent under protocols approved by the University of California San Diego.

Induced pluripotent stem cells (iPS cells) were generated as previously described (13). Briefly, primary skin fibroblasts from affected and unaffected passage-matched control were cultured in DMEM (Invitrogen) supplemented with 10% FBS (Gemini) and mesenchymal stem cell growth medium (MSCGM), respectively. Three micrograms of expression plasmid mixtures (*OCT3/4*, *SOX2*, *KLF4*, *c-MYC*, *LIN28* and *MYCL1*) were electroporated into  $6 \times 10^5$  of cells.

The cells were trypsinized 7 d after transduction, and  $1.5 \times 10^5$  cells were re-plated onto 100-mm dishes with  $1.5 \times 10^5$  irradiated CF-1 mouse embryonic fibroblasts (MEF) feeder layer. The culture medium was replaced the next day with standard hESC/iPSC media, DMEM:F12 (Invitrogen) supplemented with 20% KOSR (Invitrogen) and 20 ng/ml bFGF (Invitrogen). Colonies with good appearance were selected for further cultivation and evaluation.

After 3 passages iPS cells were transferred to MEFs free plates and growth in mTeSer media (Stem Cells Technologies).

Neural progenitors cells (NPCs) were obtained as previously described (26). Briefly, embryoid bodies (EBs) were formed by mechanical dissociation of cell clusters and plated in hESC medium without bFGF and kept shaking at 95 rpm

for 7 days. On the 7<sup>th</sup> day, EBs were plated onto poly-ornithine/laminin (Sigma)-coated dishes in DMEM/F12 plus 1XN2 (Invitrogen). Rosettes were visible to collect after 7 to 10 days, dissociated with Accutase (Chemicon), and plated again onto laminin-coated dishes with NPC media (DMEM/F12; 0.5X N2; 0.5X B27 and FGF2). To ensure reproducible and consistent data, homogeneous populations of NPCs were achieved by FACS sorting, as previously described (14). Briefly, cells were dissociated with Accutase for 20 minutes and CD184<sup>+</sup>, CD24<sup>+</sup>, CD44<sup>-</sup>, CD271<sup>-</sup> NPCs were FACS-purified and plated onto poly-ornithine/laminin-coated plates and cultured with bFGF.

To obtain differentiated neurons 1X10<sup>6</sup> NPCs were plated in 1X10 cm plated coated with poly-ornithine/laminin and differentiated in DMEM:F12 supplemented with 1X B27, 20ng/ml BDNF and 20 ng/ml GDNF for at least 4 weeks before experiments. Media was replaced every 2-3 days.

### **Immunocytochemistry and immunohistochemistry**

Cells were fixed in 4% paraformaldehyde for 10 minutes and subsequently permeabilized with 0.5% Triton X-100 in PBS. Cells were then incubated for 1 hour with the blocking solution (PBS containing 0.5% Triton X-100 and 5% donkey serum) followed by incubation with primary antibody, in PBS:blocking solution (1:1), overnight at 4 °C. After three washes with PBS, cells were incubated with fluorescently labeled secondary antibodies (Jackson ImmunoResearch) for 1 hr at room temperature. Fluorescent signal was detected using an Olympus FluoView 1000 inverted confocal microscope and images were processed with Photoshop CS5 (Adobe Systems). For



immunohistochemistry mice were transcardially perfused with 4% paraformaldehyde in phosphate buffer (pH 7.4). Tissues were further fixed in the same buffer for additional 2 hours and embedded sucrose-based media.

The following primary antibodies were used: Tra1-81 (1:200, Chemicon), Sox-2 (1:1000, Millipore), Nanog (1:200, Santa Cruz), SSAE3 (1:200, Chemicon), Tra1-60 (1:200, Chemicon), Nestin (1:2000, Chemicon), VGlut1 (1:400, Synaptic System), GABA-A (1:200, Millipore), Tuj1 (1:500, Covance), Map2(1:1000, Sigma), Cux1 (1:400, SantaCruz), Ct1p2 (1:400, Abcam).

### **Mice**

Experiments were performed in accordance with protocols approved by the Institutional Animal Care and Use Committee at the University of California, San Diego. The mice were fed diets containing either 2% or 7% BCAAs (W/W) consisting of a ratio of 2:1:1.2 (leucine:isoleucine:valine). Typical chow diets contain 2-3.5% BCAAs. Mice were observed for hind-limb claspings and/or seizures, twice a day. When indicated in the figures, the diet was changed to either 2% or 7% BCAA content. The mice were observed twice a day for the additional time indicated.

### **Human Branched Chain Amino Acid Supplementation**

A powdered branched chain amino acid mixture with a ratio of leucine:isoleucine:valine 1:1:1 (Jo Mar Laboratories, Campbell, California, USA) or 2:1:1 (Ajinomoto) were used to supplement the affected individuals in Family 18 and 558, respectively.

Based on a protocol accepted by the human investigations committee, we assayed pre-supplementation amino acids in the affected individuals and began adding BCAA supplement to their beverages three (Family 558) or four times (Family 18) daily during breakfast, lunch, dinner, and a night-time snack.

For 18-IV-1, the total daily starting amount of supplement was 0.5 grams/kg/day. Approximately 4 weeks later this was increased to 0.7 grams/kg/day.

For 18-IV-2, the total daily starting amount of supplement was 0.64 grams/kg/day. Approximately 4 weeks later this was increased to 0.8 grams/kg/day.

For 558-IV-2 and 558-IV-3 the starting amount was 0.6 g/Kg/day. Approximately 2 weeks later this was increased to 1 g/Kg/day.

### **Web Resources**

The URLs for data presented herein are as follows:

Online Mendelian Inheritance in Man (OMIM), <http://www.omim.org>

SeattleSeq Annotation, <http://gvs.gs.washington.edu/>

Genome browser, <http://www.genome.ucsc.edu/>

UCSC gene ID for BCKDK cDNA: uc010cai.3

## SUPPLEMENTARY TEXT

**558-IV-2** was born at full term by normal delivery to a healthy mother (G5P2Ab3) after an uneventful pregnancy. There was no history of intellectual disability or epilepsy in the family. The mother and the healthy brother (IV-1) reported episodes of migraine headaches. At 4 months of age 558-IV-2 had bilateral cataracts that were corrected at the age of 2. She developed normally until the age of 18 months, when she had her first seizure. Parents reported that there was also a single febrile seizure before the age of 2. She walked at the age of 2 and said her first word at the age of 4. She tested negative for known metabolic disorders. No chromosomal abnormalities were identified. Cranial MRI was normal. EEG showed epileptic activity in the left hemisphere, and she was treated with oxcarbazepine. At the time of our first examination she was 15 years and 7 months old. The parents reported difficulties with communication, including the inability to speak in sentences, social disabilities, including the inability to play with children her age, repetitive behaviors, and symptoms of intellectual disability, including deficits in the activities of daily living. She met the DSM-IV-TR (27) criteria for autism. Physical examination was normal except for hyperactive deep tendon reflexes. Head circumference was 49 cm (-3 SD) (Table S8), indicating a mild microcephaly with bi-frontal narrowing. New EEGs were performed at the age of 20 and 21, and both reported extra temporal (bilateral frontal) and generalized epileptiform abnormalities. She is currently taking risperidone and valproate. Despite these medications, she has generalized,

tonic-clonic seizures, every 3 months, that last 3-4 minutes each.

At the age of 21, no substantial improvements were observed. For instance, she was still unable to speak in sentences, to take care of herself, to follow general safety rules at home, to cross the street alone, to say “hello” and “good-bye” at the appropriate time, to control anger, and she could not complete a simple puzzle.

Plasma amino acids levels were within the normal range except for significant reductions in BCAA levels (Table S3). Urine amino acids and plasma organic acids are reported in Table S6 and S7, respectively.

**558-IV-3** was born at full term to a healthy mother (G6P3Ab3). She was generally healthy until the age of 40 days when she had hypocalcemic convulsions. At 18 months she began walking and said her first word. She was toilet trained at the age of 6. She tested negative for known metabolic disorders. No chromosomal abnormalities were identified. Cranial MRI was normal. At the time of our first examination she was 11 years and 9 months old. The parents reported symptoms of difficulties with communication, including the inability to speak in sentences, social disabilities, including the inability to play with children her age, repetitive behaviors, and symptoms of intellectual disability, including deficits in the activities of daily living. She met the DSM-IV-TR criteria for autism. Physical examination was normal except for hyperactive deep tendon reflexes. Head circumference was 51 cm (Table S8). A previous EEG reported epileptic

discharges while she was sleeping and focal spikes in the left hemisphere. She was treated with oxcarbazepine.

At the age of 16 years, no substantial improvements were observed. The parents reported that she was still unable to speak in sentences, to take care of herself, to follow general safety rules at home, to cross the street alone, to say “hello” and “good-bye” at the appropriate time, and to control her anger. She could not complete a simple puzzle.

Plasma amino acids levels were within the normal range except for significant reductions in BCAA levels (Table S3). Urine amino acids and plasma organic acids are reported in Table S6 and S7 respectively.

**18-IV-1** was born at full term by normal vaginal delivery to a G1P0, healthy mother who received antibiotics during the first 2 weeks of pregnancy for an upper respiratory infection that resolved immediately. There were no other medications or exposures during the pregnancy. The pregnancy and delivery were uneventful. 18-IV-1 weighed 3.8 kg with normal APGAR scores. She had physiological jaundice that resolved after several days. She fed normally and had no difficulties with transitioning to solid foods and has eaten a normal, varied diet since. There were no growth abnormalities during infancy or toddlerhood. In terms of milestones, she did not sit until one year. She never crawled and began to walk at two years. She said her first words at two years old and never spoke in sentences.

Her parents brought her to medical attention at two years of age secondary to concerns about delays in walking, language development, intellectual ability, and social interaction. Upon interview when she was 5 years 11 months old, the parents reported significant social difficulties including that she would not play normally with same-age peers and did not interact normally with adults either. She did not engage in make-believe play. She could use only approximately 10 partial words meaningfully and could not use two-word sentences. Her parents indicated that she seemed to be able to understand more words than she could utter but many fewer than they expected for her age. She reportedly could use some gestures like waving “bye-bye,” but did not nod her head to reply “yes” or point to an object that she desired. She manifested a number of repetitive behaviors, including flapping her arms, whirling her head about, and staring for long periods at her hands as she moved them in front of her eyes. She began receiving speech and behavioral therapy twice a week at age two. At 5 years and 11 months she could feed herself, pull a chair over to reach something on a high shelf, and imitate actions. She was becoming toilet trained for urine and feces. She could not participate in schooling. Upon interview when she was 7 years and 7 months, the parents noted no significant changes in her presentation. She had one febrile seizure at one year of age and a generalized, non-febrile seizure at age 8. There were no significant head traumas. She was treated with risperidone that was withdrawn secondary to hyperprolactemia and atomoxetine that was discontinued because it had no benefit. After her non-febrile seizure she was started on carbamazepine.

In terms of family history, the parents are normal. The younger brother, 18-IV-2, has autism. A paternal uncle has schizophrenia. A second degree cousin has intellectual disability. A distant cousin reportedly has schizophrenia. Full physical and neurological examinations at age eight were normal. There were no obvious dysmorphologies. She was left-hand dominant. Stature, weight, and head circumference were normal during the course of development (Table S8). Hearing by ABR was normal bilaterally. CT brain, Fragile X, chromosomal analysis, and CNV analysis were all negative. EEG was normal at age 4 and abnormal at age 8, with “frequent focal spike wave complexes over the left temporal region consistent with left temporal epileptogenic dysfunction.” Plasma amino acids were essentially normal except for significant reductions in BCAAs (Table S4). Repeat fasting plasma amino acids using a dried blood spot card and LC-MS and FIA-MS/MS at the Mayo Clinic confirmed these initial results. (Table S10). Pre-albumin and CRP were analyzed on the same day at the same laboratory. Pre-albumin was minimally decreased at 0.19 g/L (0.2-0.4). CRP was normal. Fasting urine amino acids obtained at the same laboratory were clinically unremarkable and BCAAs in the urine were not elevated. (Table S6). Electrolytes and liver function tests were normal. Lipid profile was normal except for a mild elevation in LDL to 127 mg/dl (0-100). Nutritional analysis at age 8 was normal (Table S9).

ADIR (administered in Arabic) scores were as follows at 5 years 11 months: Qualitative abnormalities in reciprocal social interaction - 26 (autism cutoff is 10), Qualitative abnormalities in communication - 14 (autism cutoff is 7 if non verbal

and 8 if verbal), and Restricted, repetitive and stereotyped pattern of behavior - 3 (autism cutoff is 3). CARS (Administered in Arabic) score at age 5 years 11 months was 34 (autism cutoff is 30). At age 8 it was 33. ADOS at age 5 years and 11 months, reported by the original scoring algorithm was as follows: Communication - 8 (autism cutoff 4), Reciprocal Social Interaction - 9 (autism cutoff 7), Communication and Social Interaction Combined - 17 (autism cutoff 12), Play- 2, and Stereotyped Behaviors and Restricted Interests - 3. The parents report that at age 4 years old she received IQ testing and a score of 59. The type of test is unknown. At 7 years 7 months, a Vineland administered in Arabic gave a composite adaptive behavior score of 31.3 – in the low range.

Based on interviews at age 5 years and 11 months and 7 years and 7 months she met DSM–IV-TR criteria for autism and intellectual disability. The diagnosis of autism was corroborated by the structured interviews listed above conducted by the authors.

**18-IV-2** was born at full term by normal vaginal delivery to a G2P1, healthy mother. The mother took no medications and had no exposures during the uneventful pregnancy. Delivery was uneventful and 18-IV-2 weighed 4 kg at birth with normal APGAR scores. There were no medical issues at birth. He breastfed normally and had no difficulties with transitioning to solid foods. He has eaten a normal, varied diet since. There were no noted growth abnormalities. In terms of milestones, he was delayed in sitting. He never crawled and began to walk at



age 26 months. He said his first words at two years old and never spoke in sentences.

His parents brought him to medical attention at two years of age secondary to concerns about delays in walking, language development, intellectual ability, and social interaction. Upon interview when he was 2 years 11 months old, the parents stated that he never brought others objects including toys to show enjoyment or to engage them in play. They reported that he never pointed to objects. His parents said that he could use only around 5 words meaningfully and could not use simple, two-word sentences. He could not understand simple commands. He reportedly could use some gestures like waving "bye-bye," but did not nod his head to reply "yes." He would repetitively bite himself. Upon interview when he was 4 years and 8 months of age, the parents reported no significant differences in presentation except that he had increased repetitive movements, including intermittent hand stereotypies and flapping of his arms. He received twice weekly behavioral therapy starting at age two. At age 2 years 11 months, he could imitate others, feed himself, and was starting to clothe himself. He was not toilet trained for urine or feces. At age 4 years 8 months he understood the concept of a puzzle but could not complete even a simple one. He could not unscrew a disk from a peg. He was starting to be trained to toilet and clothe himself.

In terms of medical history, 18-IV-2 had 4 closely spaced febrile seizures at age 12 months. He was started on valproate and had a recurrence of febrile seizure once every 4 to 5 months subsequently. At age 2 years and 5 months he started

phenobarbital and has not had seizures since. At 2 years and 9 months of age the patient underwent a surgery to “release his tongue” because he was “tongue tied.” There were no significant head injuries.

Full physical and neurological examination at age 5 were normal and revealed no gross dysmorphologies. He was left-hand dominant. Hearing by ABR was normal. CT brain, Fragile X, Cytogenetics, and CNV analysis were all negative. EEG was normal at age 5 but abnormal on multiple previous occasions with a report of “Center encephalic epileptogenic dysfunction.” Fasting plasma amino acids were essentially normal except for significant reductions in BCAAs (Table S4). Repeat fasting plasma amino acids using a dried blood spot card and LC-MS and FIA-MS/MS at the Mayo Clinic confirmed these initial results. (Table S10). Pre-albumin and CRP were analyzed on the same day at the same laboratory. Pre-albumin was minimally decreased at 0.16 g/L (0.2-0.4). CRP was normal. Fasting urine amino acids obtained at the same laboratory were clinically unremarkable and BCAAs in the urine were not elevated. (Table S6). Urine organic acids obtained at the same laboratory were normal. Electrolytes and liver function tests were normal. Lipid profile was normal. Nutritional analysis at age 5 was normal (Table S9).

ADIR (28)(administered in Arabic) scores at age 2 years 11 months were as follows: Qualitative abnormalities in reciprocal social interaction - 18 (autism cutoff is 10), Qualitative abnormalities in communication - 9 (autism cutoff is 7 if non-verbal and 8 if verbal), and Restricted, repetitive and stereotyped pattern of behavior - 4 (autism cutoff is 3). CARS (29)(administered in Arabic) score at age

5 years 1 month was 34.5 (autism cutoff is 30). ADOS (30)(administered in Arabic) scores at age 2 years 11 months and reported by the original scoring algorithm were as follows: Communication - 7 (autism cutoff 4), Reciprocal Social Interaction - 11 (autism cutoff 7), Communication and Social Interaction Combined - 18 (autism cutoff 12), Play - 3, and Stereotyped Behaviors and Restricted Interests - 2. At age 4 years and 8 months ADOS reported by the original scoring algorithm was as follows: Communication - 5 (autism cutoff 4), Reciprocal Social Interaction - 11 (autism cutoff 7), Communication and Social Interaction Combined - 16 (autism cutoff 12), Play - 3, and Stereotyped Behaviors and Restricted Interests - 1. There is no formal IQ testing. In terms of adaptive behavior, a Vineland was administered when he was 4 years and 8 months old in Arabic, and the composite adaptive behavior score was 40.5 – in the low range.

Based on the clinical presentation he met DSM-IV-TR criteria for autism and intellectual disability. The diagnosis of autism was corroborated by the structured interviews listed above conducted by the authors.

**1435-IV-6** was born at full term after an uneventful pregnancy. The parents are healthy. There is no history of epilepsy or intellectual disability in the family. 1435-IV-6 has 8 healthy siblings who are doing well at school, have normal motor skills, and socialize normally. The five healthy male siblings all have below average head circumference (-1.5 SD). However, none of them has signs of intellectual disability. 1435-IV-6 was brought to medical attention when he was 6

years old secondary to parental concern about his development. In particular, the parents reported that he could not speak. At the time of our first visit, he was 9 years old. The parents reported that he had no words and that they were concerned about his intellectual ability. During our visit, he understood and was able to follow simple directions. However, he never spoke. He was unable to reproduce a circle, a square, or two intersecting rhombi. Physical examination was normal. Head circumference was 47.5 cm (-3SD) (Table S8). Cranial MRI was normal. An EEG at 11 years showed no abnormalities. ADI-R (administered in Arabic) scores were as follows at 7 years: Qualitative abnormalities in reciprocal social interaction - 27 (autism cutoff is 10), Qualitative abnormalities in communication - 18 (autism cutoff is 7 if non verbal and 8 if verbal), and Restricted, repetitive and stereotyped pattern of behavior - 7 (autism cutoff is 3). CARS (29)(administered in Arabic) score at age 7 years was 39.5 (autism cutoff is 30). Based on the clinical presentation he met DSM-IV-TR criteria for autism and intellectual disability. The diagnosis of autism was corroborated by the structured interviews listed above conducted by the authors.

Plasma amino acids levels were essentially normal except for a decrease in arginine and an increase in aspartate that were also present in all healthy family members and are of unknown clinical significance. While there were no internal laboratory controls available for reference, BCAAs were markedly reduced compared with normal siblings and fell at the very low end of normal or below normal compared to published reference ranges (31) (32) (Table S5).

**1435-IV-8** was born at full term after an uneventful pregnancy. He was brought to medical attention, when he was 4 years old by his parents who were concerned about his development. In particular, the parents reported that 1435-IV-8 could not speak. Upon our examination at age 5 years, the parents reported that he still had no words and that they were concerned about his intellectual ability. He understood and was able to follow simple directions, however, he never spoke. He was unable to reproduce a circle, a square, or two intersecting rhombi. Physical examination was normal. Head circumference was 47 cm (-3SD) (Table S8). He had no history of epilepsy. During our visit he understood and was able to follow simple directions. MRI was normal. An EEG at 7 years was described as abnormal, with right temporal slowing and rare surface negative frontal sharp waves. ADI-R (administered in Arabic) scores were as follows at 11 years: Qualitative abnormalities in reciprocal social interaction - 28 (autism cutoff is 10), Qualitative abnormalities in communication - 21 (autism cutoff is 7 if non verbal and 8 if verbal), and Restricted, repetitive and stereotyped pattern of behavior – 10 (autism cutoff is 3). CARS (29)(administered in Arabic) score at age 9 years was 46 (autism cutoff is 30). Based on the clinical presentation he met DSM-IV-TR criteria for autism and intellectual disability. The diagnosis of autism was corroborated by the structured interviews listed above conducted by the authors. Plasma amino acids levels were essentially normal except for a decrease in arginine and an increase in aspartate that were also present in all healthy family members and are of unknown clinical significance. While there were no internal

laboratory controls available for reference, BCAAs were markedly reduced compared with normal siblings and fell at the very low end of normal or below normal compared to published reference ranges (Table S5).

### **Supplementation results**

Dietary supplementation of the affected individuals in families 558 and 18 with BCAAs was initiated as soon as low BCAAs were confirmed and human subjects approval was obtained. Our initial aim was to determine whether plasma BCAA levels could be increased with supplementation. Currently, we continue to make adjustments in supplementation amount and frequency in order to achieve stable normalization of plasma BCAAs throughout the day to the greatest extent possible. When maximal stabilization has been achieved, our ultimate goal will be to determine whether measurable phenotypic amelioration can be attained in signs and symptoms of autism, intellectual disability, and/or epilepsy.

Transient super-elevations in plasma BCAAs were observed at 1 hour after supplementation taken with a meal at the highest supplementation amount given to date for each affected individual with supplementation amounts ranging between 0.7 and 1 g/kg/day (Table S10). At this supplementation amount a trend toward normalization of plasma BCAAs was observed in the fasting state for all affected individuals. These improvements in plasma levels of BCAAs occurred without measurable alterations in the plasma levels of other amino acids. Urine organic acids in the affected individuals from family 18 showed no accumulation of BCAA-related organic acids. Results from urine organic acid tests from family 558 are pending. To date, no adverse side effects have been reported. When

BCAAs are maximally stabilized, we plan to undertake phenotypic follow-up in both families, including serial EEG's, serial neuropsychiatric assessments, including cognitive tests and structured assessments of autism, and serial physical and neurological examinations. Supplementation of the affected individuals in family 1435 was delayed as a result of the Libyan revolution and will be initiated as soon as logistically possible.

Novarino et al. Figure S1

**A**

558

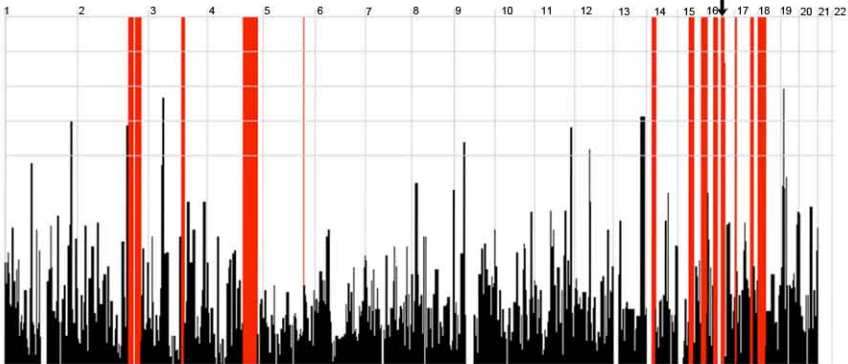

18

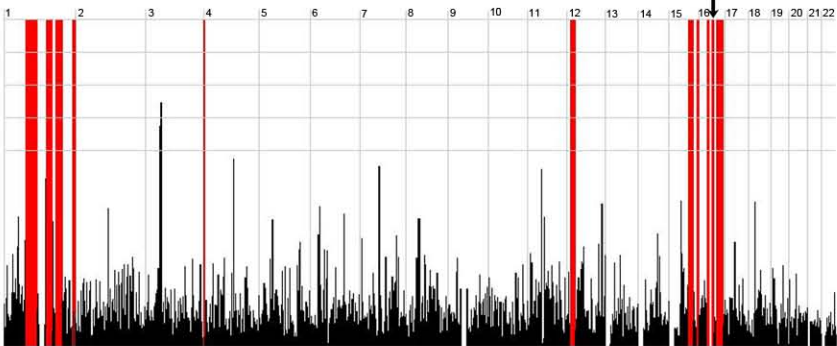

1435

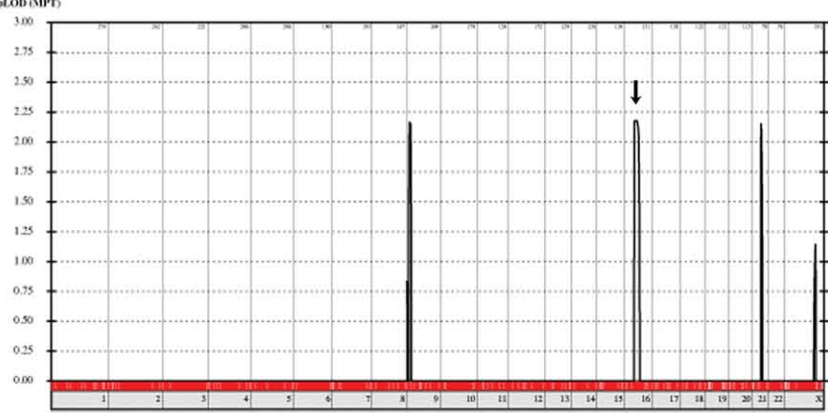

**B**

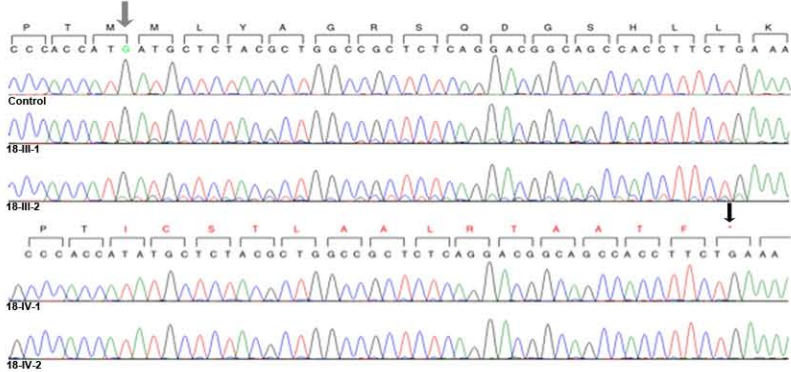



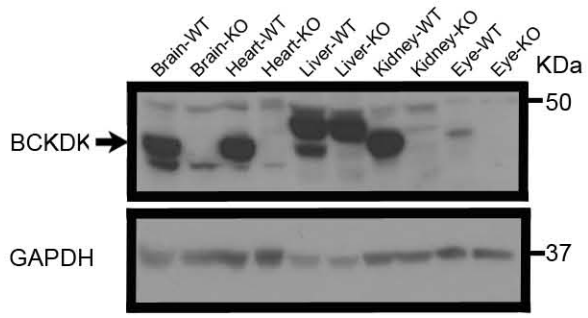

**A**

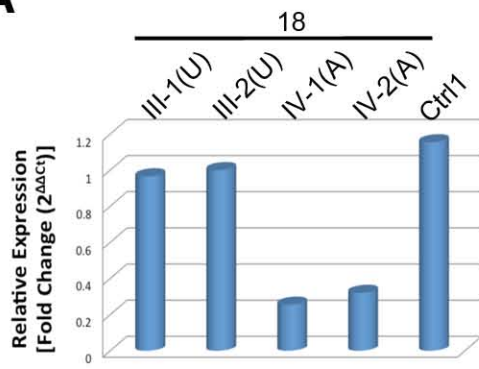

**B**

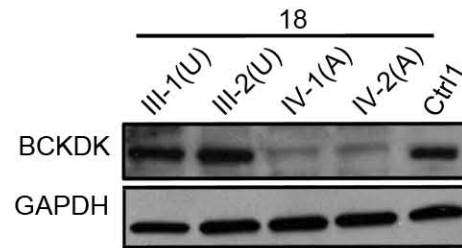

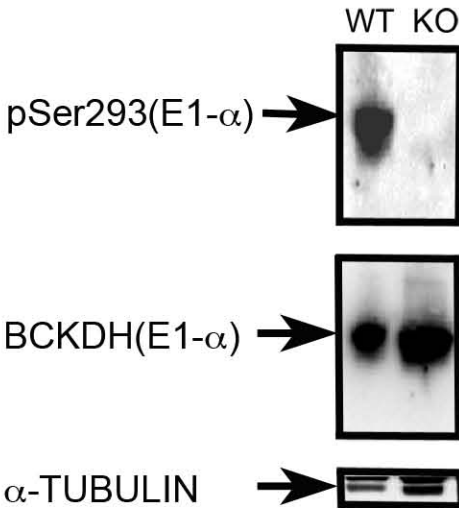

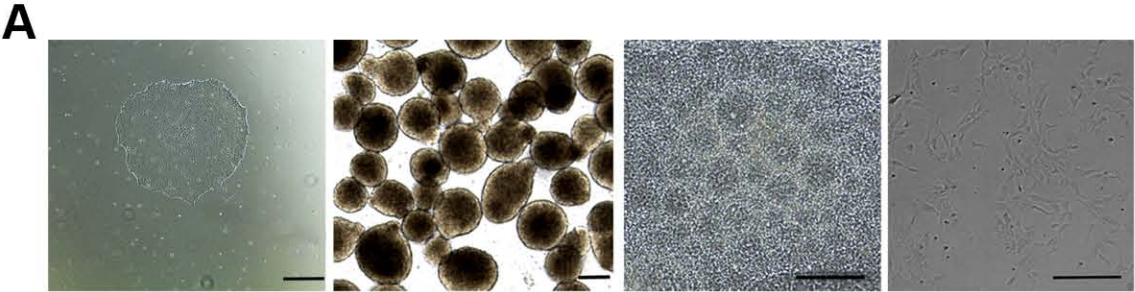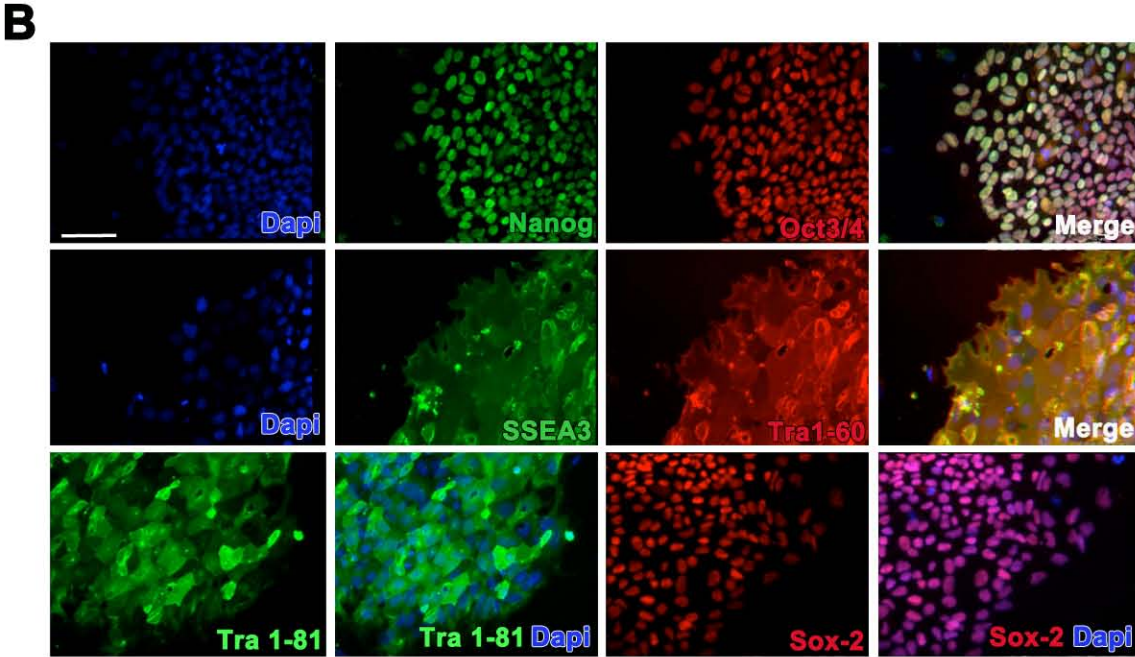

# Novarino et al. Figure S6

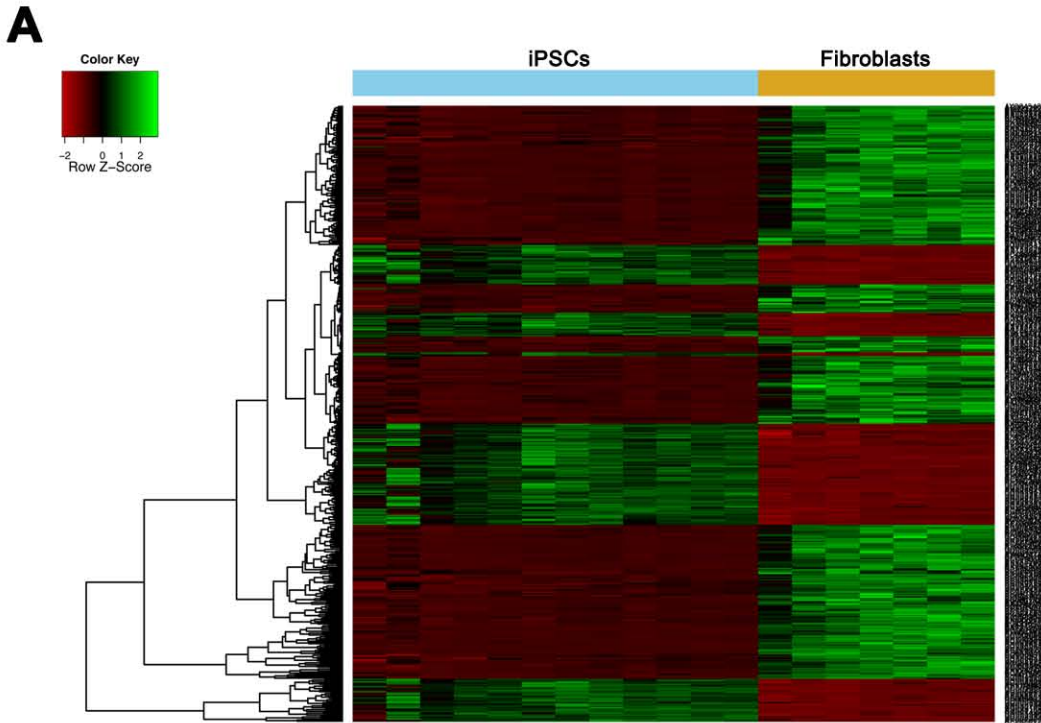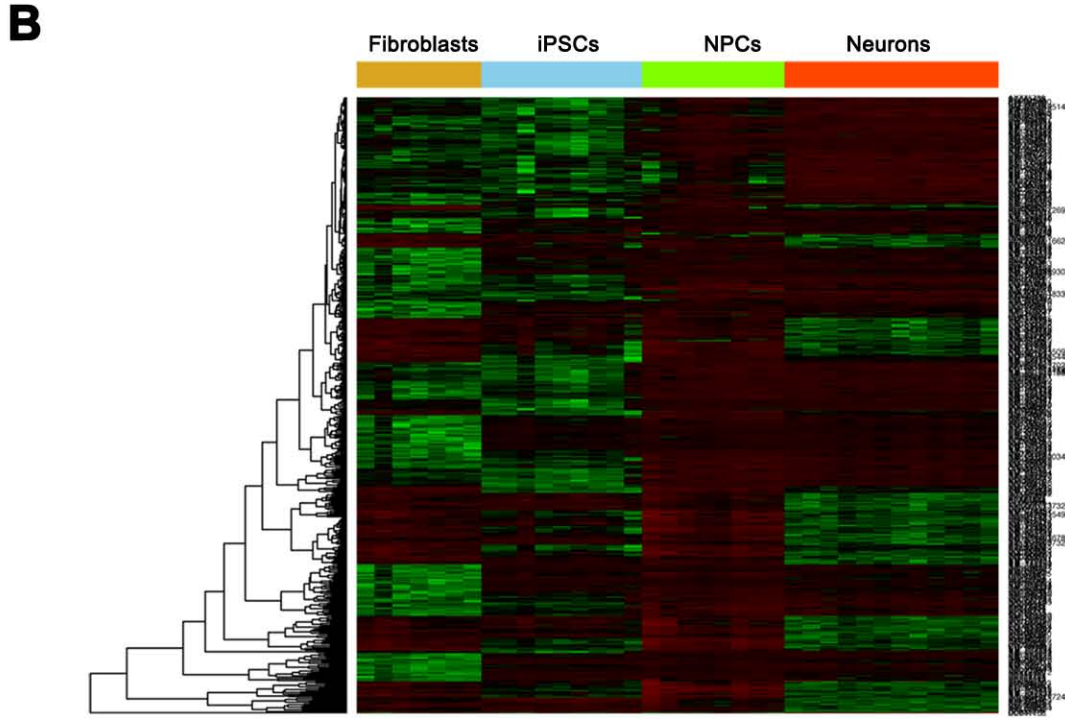

# Novarino et al. Figure S7

**A**

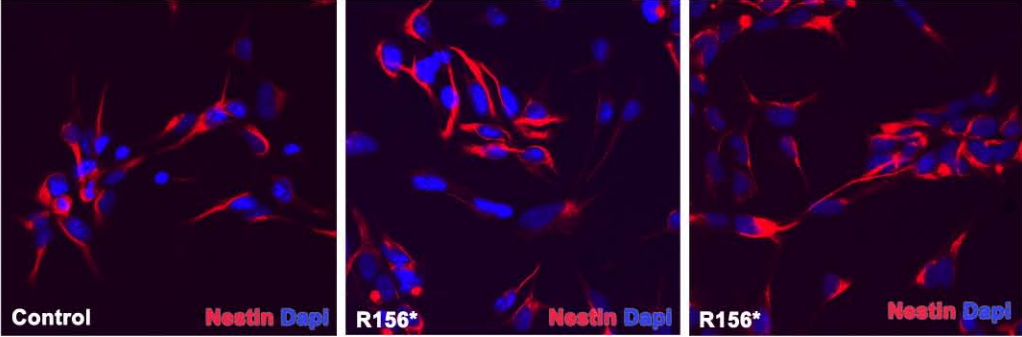

**B**

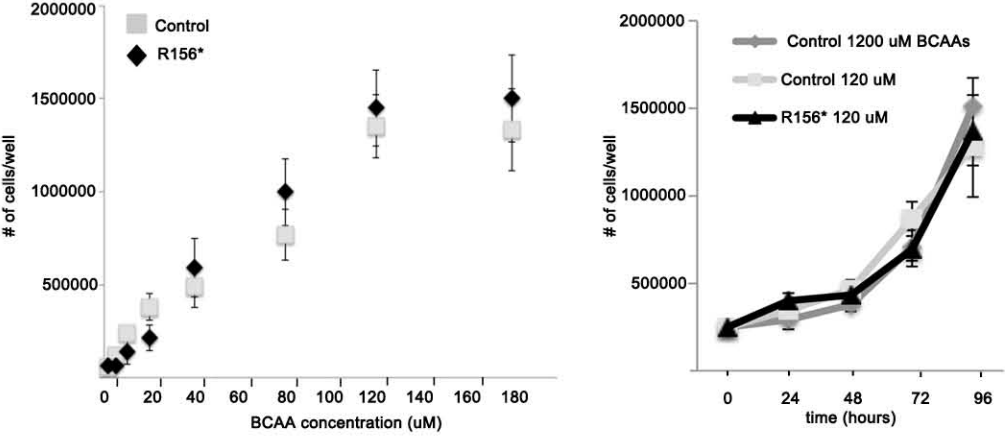

**C**

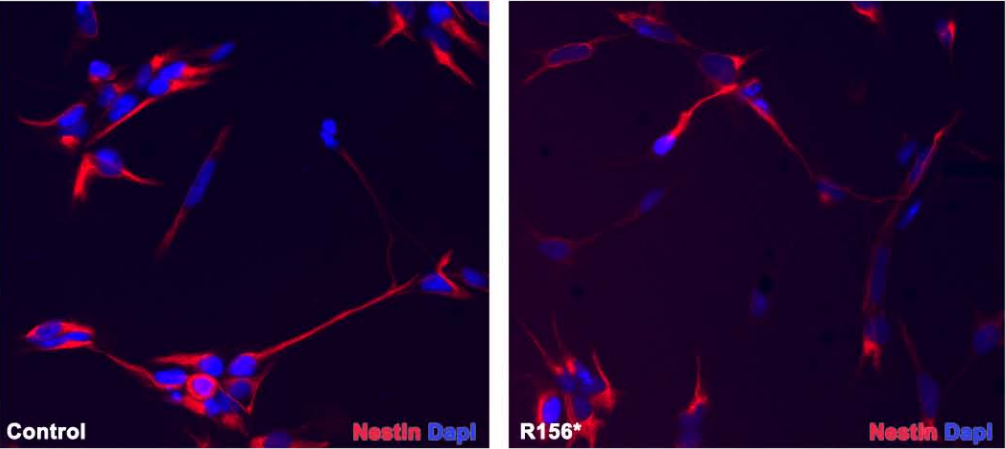

**A**

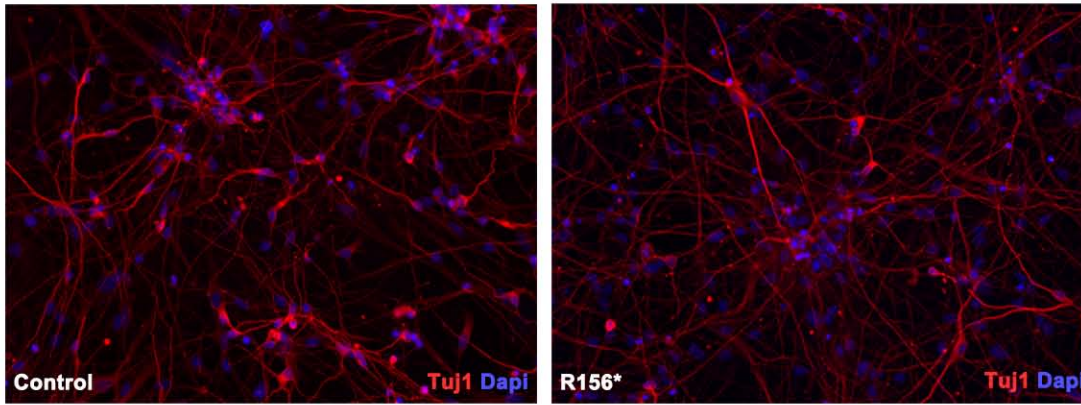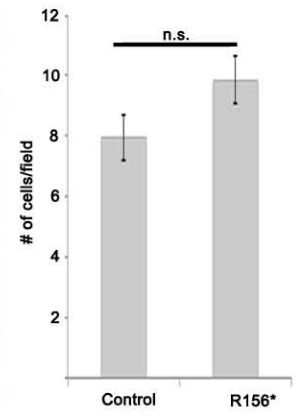

**B**

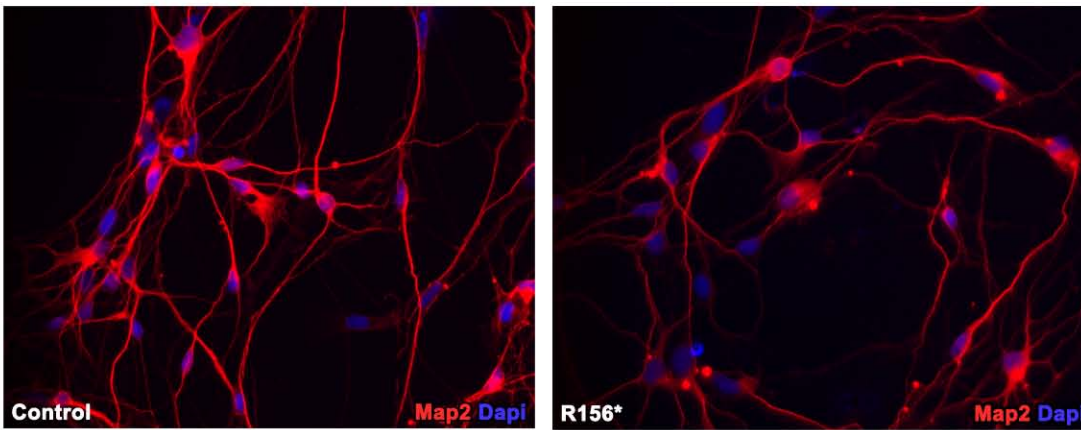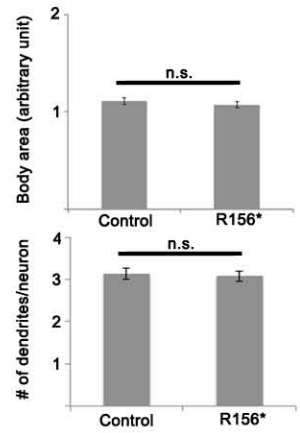

**C**

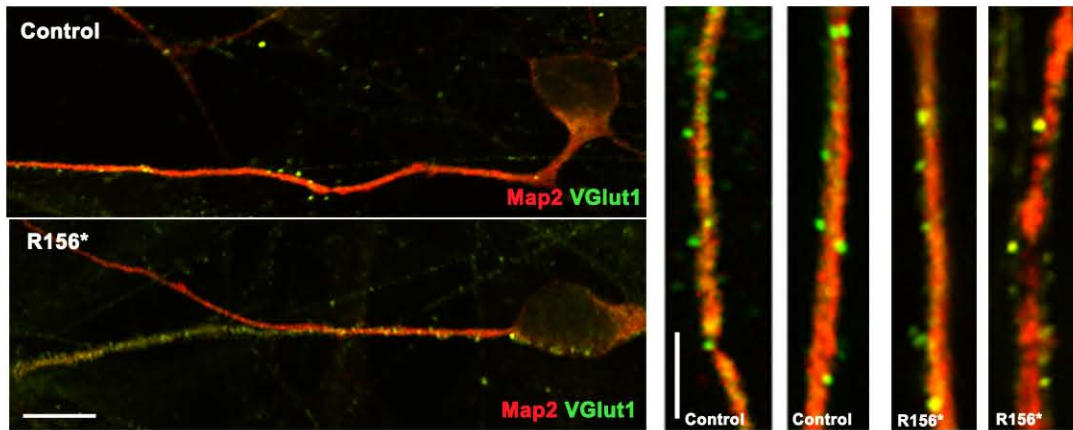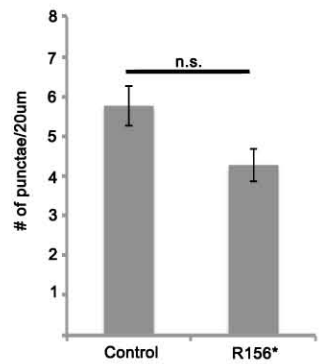

**A**

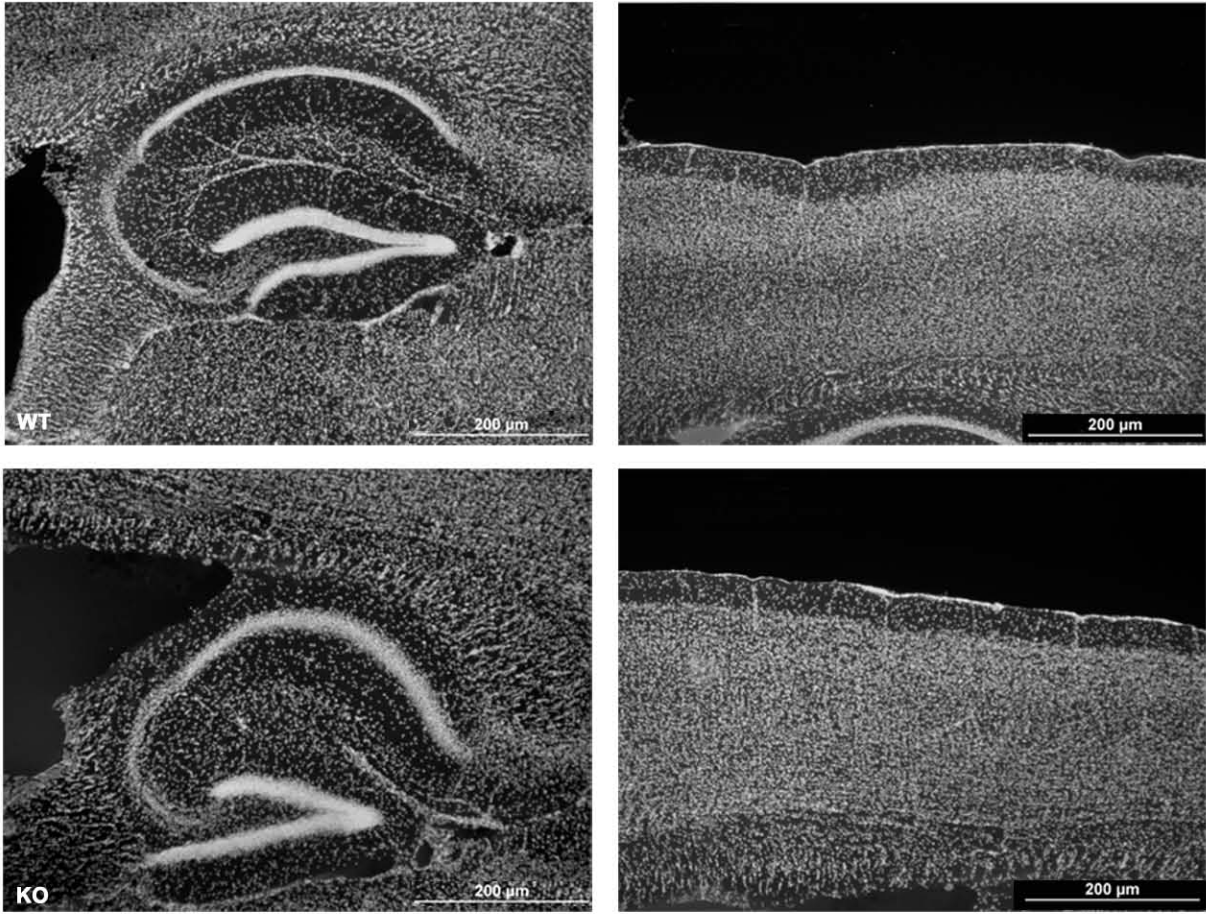

**B**

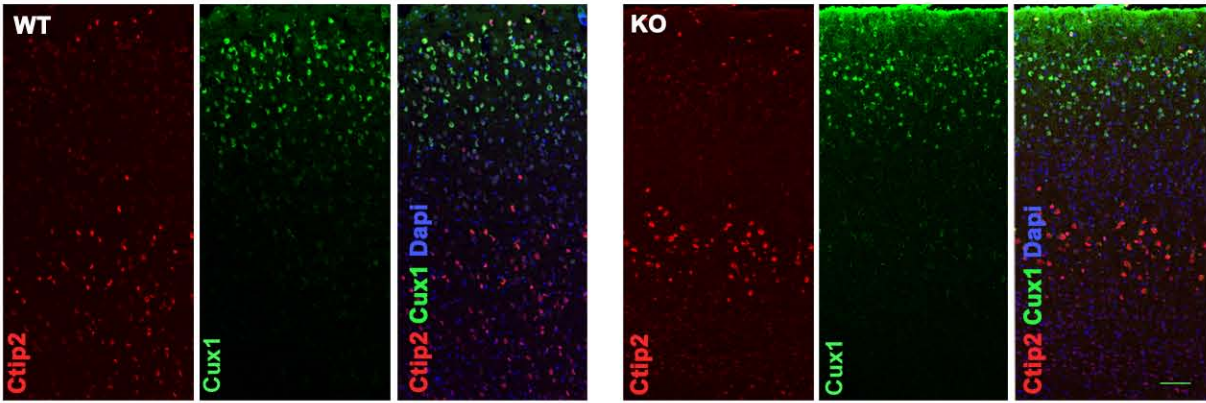



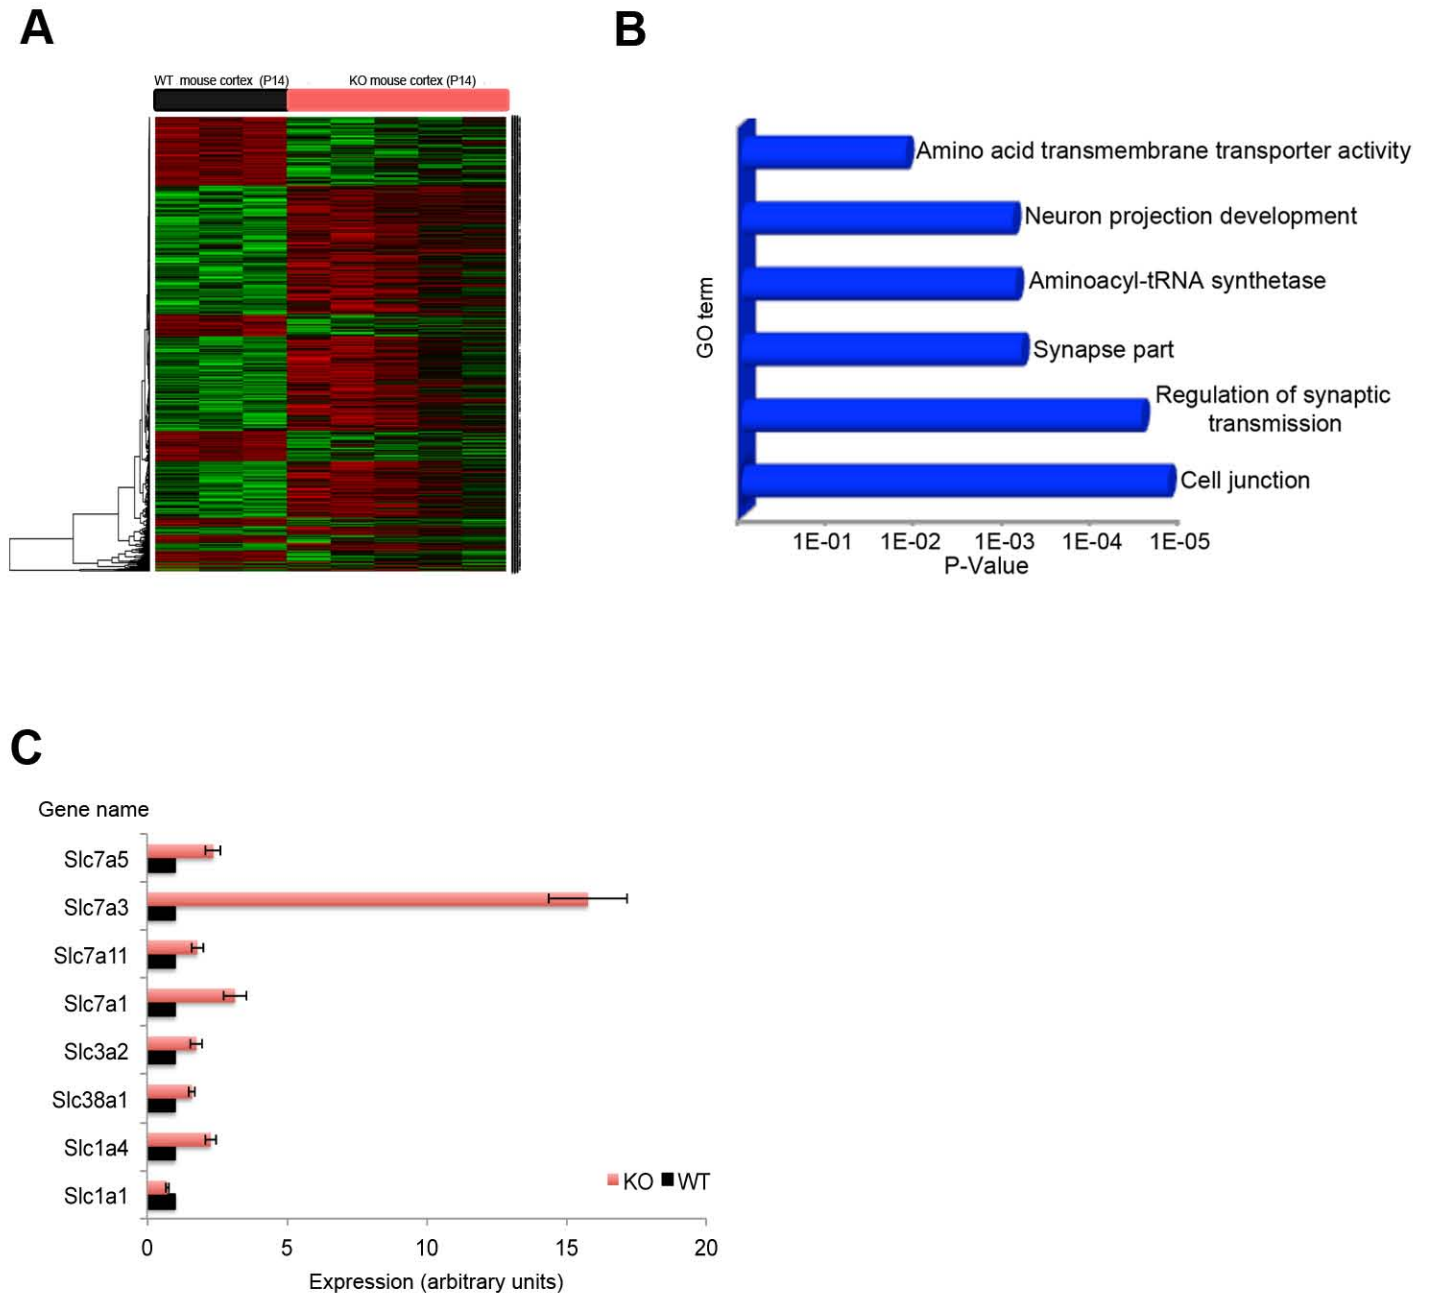

## Supplementary Figure Legends

**Fig. S1: Genotyping information for families 558, 18, and 1435.** A) Homozygosity map (558 and 18) and linkage plot (1435) for the consanguineous families with mutations in the *BCKDK* gene. Blocks of homozygosity are depicted as red peaks. Arrows indicate the interval that includes *BCKDK*. B) cDNA sequences of all the individuals of Family 18. Arrows point to the deleted base (grey) and to the premature stop codon in the two affected individuals (black).

**Fig. S2: Tissue distribution of BCKDK.** Western blot analysis of BCKDK expression in mouse tissues. GAPDH was used as loading control.

**Fig. S3: Deleterious effect of M74fs mutation in affecteds of Family 18.** A) Real-Time RT-PCR demonstrates a 3 to 4 fold decrease in BCKDK mRNA levels in the probands (IV-1 and IV-2) relative to their parents (III-1 and III-2) and an unrelated control (Ctrl1). B) BCKDK protein expression in peripheral lymphocytes determined by Western blot. The two affected (A) individuals (IV-1 and IV-2) show less expression than the parents (III-1 and III-2) and an unrelated control (Ctrl1).

**Fig. S4: BCKDH-E1- $\alpha$  subunit hypophosphorylation in *Bckdk* KO animals.** Western blot analysis shows the absent Serine-293 phospho-specific band (pSer932(E1- $\alpha$ )) in the *Bckdk* KO brain lysate despite a normal expression level of BCKDHA-E1a.

**Fig. S5: Generation of iPSCs and NPCs.** A) Representative images of iPSCs clone, embryoid bodies, neural rosettes, and neural progenitors cells (left to right). B) iPSCs from affected individuals show expression of the pluripotent markers Nanog, Oct3/4, SSEA3, Tra1-60, Tra1-81 and Sox-2. Scale bars: 500 um (A) (iPSCs), 200 um (A) (EBs, rosettes and NPCs), 100um (B).

**Fig. S6: Gene expression analysis of cells generated during fibroblast reprogramming.** A) Heatmap depicting the expression of genes differentially regulated between fibroblasts and iPSCs. B) Heatmap of differentially regulated genes in fibroblasts, iPSCs, NPCs, and neurons. Each column represents a single cell line. Genes that are highly expressed are in red and poorly expressed genes in green.

**Fig. S7: Cell proliferation and morphology of R156\* NPCs.** (A) Neural progenitors cells from the unaffected (left) and affecteds (center and right) were stained with the NPC marker nestin (red) and DAPI (blue) (20X objective). B)  $2.5 \times 10^5$  cells from unaffected and affected patients were plated in media containing different concentrations of BCAAs. Media was changed every day, and cells from multiple clones and wells were counted after 96 hours (left). NPC proliferation curve in normal (1200 uM BCAA) and modified (120 uM BCAA) media (right). Error bars indicate standard deviation. (C) Representative images of control and R156\* mutant NPCs in 120 uM BCAA (20X objective).

**Fig. S8: R156\* neurons display unremarkable morphology and presynaptic marker density.** Representative images of Tuj1 (A) and Map2 (B) staining of iPSC-derived neurons of unaffected (left) and affected (right) individuals and quantification of cell density (A), neuron body size (ctrl n=153, R156\* n=164) and number of dendrites per neuron (ctrl n=109, R156\* n=131) (B). Error bars represent standard error. Dapi (blue) was used to stain nuclei. Magnifications: 20X (A), 40X (B). C) VGlut1 (green) stained presynaptic vesicular glutamate transporter. No major differences were observed between control and R156\* neurons. Scale bars 10 and 5 um. Quantification of VGlut1 positive punctae density is shown on the right . Error bars represent standard deviation.

**Fig. S9: Absence of gross alterations in brain architecture in *Bckdk*<sup>-/-</sup> mice.** A) Nuclei staining of hippocampus (left) and cerebral cortex (right) in *Bckdk*<sup>-/-</sup> and their wildtype littermates showing no gross morphological abnormalities. B) Cerebral cortex of wildtype and *Bckdk* knockout animals stained with Cux1 and Ctip2 showing no major abnormalities in cell layers distribution. Scale bars 60 um.

**Fig. S10: Gene expression analysis of *Bckdk*<sup>-/-</sup> animals brain cortex.** (A) Heatmap depicting the expression of genes differentially regulated between wildtype and *Bckdk*<sup>-/-</sup> brain cortices. Each column represents a single mouse. Genes that are highly expressed in knockout cells relative to controls are shown

in red. (B) Relevant gene ontology categories enriched in differentially expressed genes. C) Normalized expression of brain amino acids transporters in *Bckdk*<sup>-/-</sup> relative to wildtype mice.

# Novarino et al. Table S1

**Table S1: Phenotypic and genetic information of the patients carrying mutations in the *BCKDK* gene.**

Abbreviations: ID, Intellectual Disability; EEG, electroencephalogram; BCAAs, branched chain amino acids

| Family data    |         |     |        | Clinical data                               |          |          |       | Genetic data      |                   |
|----------------|---------|-----|--------|---------------------------------------------|----------|----------|-------|-------------------|-------------------|
| Identification | Age (y) | Sex | Origin | Diagnoses                                   | EEG      | Seizures | BCAAs | Nucleotide change | Amino acid change |
| 558-IV-2       | 22      | F   | Turkey | autism <sup>a</sup> , ID <sup>a</sup>       | abnormal | no       | low   | C466T             | R156*             |
| 558-IV-3       | 18      | F   | Turkey | autism <sup>a</sup> , ID <sup>a</sup>       | abnormal | yes      | low   | C466T             | R156*             |
| 18-IV-1        | 8       | F   | Egypt  | autism <sup>a,b,c,d</sup> , ID <sup>a</sup> | abnormal | yes      | low   | G222del           | M74fs             |
| 18-IV-2        | 5       | M   | Egypt  | autism <sup>a,b,c,d</sup> , ID <sup>a</sup> | abnormal | yes      | low   | G222del           | M74fs             |
| 1435-IV-6      | 11      | M   | Libya  | autism <sup>a,b,c</sup> , ID <sup>a</sup>   | normal   | no       | low   | G671C             | R224P             |
| 1435-IV-8      | 7       | M   | Libya  | autism <sup>a,b,c</sup> , ID <sup>a</sup>   | abnormal | no       | low   | G671C             | R224P             |

**Method of Diagnosis**

a Diagnostic and Statistical Manual of Mental Disorders (DSM-IV-TR) criteria (American Psychiatric Association (2000))

b Childhood Autism Rating Scale (CARS)(Schopler, Reichler et al. 1986)

c Autism Diagnostic Interview Revised (ADI-R) (Lord, Rutter et al. 1994)

d Autism Diagnostic Observation Schedule (ADOS) (Lord, Risi et al. 2000)

## Novarino et al. Table S2

**Table S2: Other segregating, rare variants discovered in the affected individuals using whole-exome sequencing.** Despite being novel relative to dbSNP, most of the mutations were not conserved across species and were predicted to be benign by the Polyphen algorithm (1).

| Family | Gene Name                                                                       | Amino Acid Change |
|--------|---------------------------------------------------------------------------------|-------------------|
| 558    | ATP/GTP binding protein-like 1( <i>AGBL1</i> )                                  | R504Q             |
| 558    | Integrator complex subunit 2 ( <i>INTS2</i> )                                   | R33K              |
| 558    | Zinc finger, MYND-type containing 15 ( <i>ZMYND15</i> )                         | G457S             |
| 18     | Neuron Navigator 1 ( <i>NAV1</i> )                                              | A912V             |
| 18     | Calcium Channel, Voltage-Dependent, L type, alpha 1S Subunit ( <i>CACNA1S</i> ) | E1837A            |
| 18     | Chitinase 1 ( <i>CHIT1</i> )                                                    | S345G             |
| 18     | Protein Tyrosine Phosphatase, Non-Receptor Type 9 ( <i>PTPN9</i> )              | V46M              |
| 1435   | HEAT repeat containing 3 ( <i>HEATR3</i> )                                      | R337K             |

1. Adzhubei, I. A. *et al.*, A Method and Server for Predicting Damaging Missense Mutations. *Nat Methods* 7, 248 (2010).

# Novarino et al. Table S3

**Table S3: Plasma amino acids of individuals of Family 558.** Plasma amino acids of blood drawn on different days and analyzed by different laboratories for unaffecteds (U) and affecteds (A). Plasma BCAA levels of the affected patients are shown in red.

Plasma amino acids February 2011 (fasting for 14 hours, analyzed at Mayo Clinic by LC-MS/MS. Values are expressed in nmol/ml).

| Patient<br>Amino Acid | 558-III-1<br>(U) | 558-III-2<br>(U) | 558-IV-1<br>(U) (23y) | 558-IV-2<br>(A) (21y) | 558-IV-3<br>(A) (17y) | Reference<br>Range <18<br>years old | Reference<br>Range >18<br>years old |
|-----------------------|------------------|------------------|-----------------------|-----------------------|-----------------------|-------------------------------------|-------------------------------------|
| Taurine               | 62               | 149              | 217                   | 76                    | 146                   | 10-170                              | 54-210                              |
| Asparagine            | 47               | 57               | 56                    | 39                    | 42                    | 23-112                              | 35-74                               |
| Serine                | 97               | 128              | 118                   | 112                   | 121                   | 69-137                              | 58-181                              |
| Glycine               | 193              | 373              | 235                   | 227                   | 213                   | 127-341                             | 151-490                             |
| Glutamine             | 787              | 767              | 821                   | 579                   | 642                   | 264-823                             | 205-756                             |
| Histidine             | 86               | 92               | 105                   | 92                    | 80                    | 41-125                              | 72-124                              |
| Threonine             | 135              | 153              | 107                   | 132                   | 156                   | 35-226                              | 60-225                              |
| Citruline             | 31               | 36               | 28                    | 21                    | 22                    | 1-46                                | 12-55                               |
| B-alanine             | <25              | <25              | <25                   | <25                   | <25                   | 0-7                                 | 0-12                                |
| Alanine               | 531              | 478              | 406                   | 381                   | 440                   | 152-547                             | 177-583                             |
| Glutamate             | 95               | 69               | 111                   | 55                    | 74                    | 5-150                               | 10-131                              |
| Arginine              | 126              | 98               | 119                   | 75                    | 102                   | 10-140                              | 15-128                              |
| Proline               | 297              | 202              | 219                   | 273                   | 200                   | 59-369                              | 97-329                              |
| Ornithine             | 59               | 78               | 60                    | 38                    | 54                    | 10-163                              | 48-195                              |
| Cystine               | 42               | 45               | 47                    | 37                    | 30                    | 5-45                                | 5-82                                |
| Lysine                | 200              | 200              | 198                   | 169                   | 227                   | 48-284                              | 116-295                             |
| Methionine            | 40               | 38               | 48                    | 26                    | 31                    | 7-47                                | 1042                                |
| Tyrosine              | 85               | 74               | 91                    | 87                    | 82                    | 24-115                              | 34-112                              |
| Phenylalanine         | 74               | 68               | 87                    | 54                    | 77                    | 28-91                               | 35-85                               |
| Valine                | 208              | 185              | 254                   | 44                    | 57                    | 74-321                              | 119-336                             |
| Leucine               | 133              | 111              | 191                   | 24                    | 33                    | 49-216                              | 72-201                              |
| Isoleucine            | 83               | 55               | 101                   | 13                    | 15                    | 22-107                              | 30-108                              |

Plasma amino acids June 28 2011 (fasting for 14 hours, analyzed at the Baylor Research Institute by HPLC. Values are expressed in uM).

| Patient<br>Amino Acid | 558-IV-1<br>(U) | 558-IV-2<br>(A) | 558-IV-3<br>(A) | Reference<br>Range |
|-----------------------|-----------------|-----------------|-----------------|--------------------|
| Phosphoserine         | <1              | <1              | <1              | 0-12               |
| Hydroxyproline        | 9               | 15              | 13              | 0-37               |
| Histidine             | 83              | 108             | 78              | 42-116             |
| Asparagine            | 43              | 66              | 53              | 30-78              |



|                        |     |     |     |         |
|------------------------|-----|-----|-----|---------|
| Taurine                | 55  | 73  | 76  | 33-92   |
| N-1-Methylhistidine    | 6   | 8   | 4   | 0-21    |
| Serine                 | 117 | 184 | 151 | 63-185  |
| Glutamine              | 550 | 652 | 492 | 424-720 |
| Carnosine              | 7   | 6   | 5   | 0-0     |
| Arginine               | 128 | 193 | 175 | 20-122  |
| Glycine                | 236 | 411 | 274 | 117-366 |
| Anserine               | <1  | <1  | <1  | 0-0     |
| Ethanolamine           | 8   | 8   | 12  | 0-1-    |
| Aspartic acid          | 23  | 29  | 27  | 0-10    |
| Sarcosine              | <1  | <1  | <1  | 0-0     |
| Glutamate              | 82  | 79  | 78  | 28-112  |
| Citrulline             | 29  | 27  | 24  | 11-51   |
| B-alanine              | 3   | <1  | <1  | 0-0     |
| Threonine              | 93  | 286 | 243 | 62-182  |
| Alanine                | 463 | 868 | 793 | 162-572 |
| GABA                   | <1  | <1  | <1  | 0-0     |
| A-aminoadipic Acid     | <1  | <1  | <1  | 0-13    |
| Proline                | 260 | 484 | 340 | 65-380  |
| B-Aminoisobutyric Acid | <1  | <1  | <1  | 0-0     |
| Hydroxylysine          | <1  | <1  | <1  | 0-1     |
| A-Aminobutyric Acid    | 12  | 8   | 1   | 7-33    |
| Cystathionine          | <1  | <1  | 1   | 0-0     |
| Ornithine              | 56  | 62  | 63  | 36-118  |
| Cystine                | 7   | 7   | 5   | 9-53    |
| Lysine                 | 164 | 319 | 292 | 122-285 |
| Tyrosine               | 48  | 89  | 91  | 30-100  |
| Methionine             | 31  | 42  | 36  | 14-41   |
| Tryptophan             | 111 | 83  | 102 | 23-86   |
| Alloisoleucine         | <1  | <1  | <1  | 0-0     |
| Phenylalanine          | 97  | 92  | 104 | 35-83   |
| Homocystine            | <1  | <1  | <1  | 0-0     |
| Valine                 | 256 | 89  | 86  | 108-295 |
| Leucine                | 165 | 46  | 46  | 60-204  |
| Isoleucine             | 88  | 23  | 26  | 39-119  |

Plasma amino acids September 21, 2011 (fasting for 14 hours, analyzed at the Baylor Research Institute by HPLC. Values are expressed in uM).

| <b>Patient</b>                    | <b>558-IV-2<br/>(A)</b> | <b>558-IV-3<br/>(A)</b> | <b>Reference<br/>Range</b> |
|-----------------------------------|-------------------------|-------------------------|----------------------------|
| <b>Amino Acid</b>                 |                         |                         |                            |
| <b>Phosphoserine</b>              | <1                      | <1                      | 0-12                       |
| <b>Hydroxyproline</b>             | 11                      | 10                      | 0-37                       |
| <b>Histidine</b>                  | 107                     | 73                      | 42-116                     |
| <b>Phosphoethanolamine</b>        | <1                      | <1                      | 0-3                        |
| <b>Asparagine</b>                 | 44                      | 43                      | 30-78                      |
| <b>N-3-Methylhistidine</b>        | 2                       | 8                       | 0-8                        |
| <b>Taurine</b>                    | 69                      | 78                      | 33-92                      |
| <b>N-1-Methylhistidine</b>        | 4                       | 3                       | 0-21                       |
| <b>Serine</b>                     | 147                     | 119                     | 63-185                     |
| <b>Glutamine</b>                  | 472                     | 467                     | 424-720                    |
| <b>Carnosine</b>                  | <1                      | <1                      | 0-0                        |
| <b>Arginine</b>                   | 95                      | 71                      | 20-122                     |
| <b>Glycine</b>                    | 283                     | 251                     | 117-366                    |
| <b>Anserine</b>                   | 6                       | 6                       | 0-0                        |
| <b>Ethanolamine</b>               | 10                      | 12                      | 0-1-                       |
| <b>Aspartate</b>                  | 11                      | 10                      | 0-10                       |
| <b>Sarcosine</b>                  | <1                      | <1                      | 0-0                        |
| <b>Glutamate</b>                  | 75                      | 83                      | 28-112                     |
| <b>Citrulline</b>                 | 23                      | 24                      | 11-51                      |
| <b>B-alanine</b>                  | 6                       | 6                       | 0-0                        |
| <b>Threonine</b>                  | 171                     | 239                     | 62-182                     |
| <b>Alanine</b>                    | 505                     | 626                     | 162-572                    |
| <b>GABA</b>                       | <1                      | <1                      | 0-0                        |
| <b>A-aminoadipic Acid</b>         | <1                      | <1                      | 0-13                       |
| <b>Proline</b>                    | 283                     | 263                     | 65-380                     |
| <b>B-Aminoisobutyric<br/>Acid</b> | <1                      | <1                      | 0-0                        |
| <b>Tryptophan</b>                 | 87                      | 104                     | 23-86                      |
| <b>A-Aminobutyric Acid</b>        | 3                       | <1                      | 7-33                       |
| <b>Cystathionine</b>              | <1                      | <1                      | 0-0                        |
| <b>Ornithine</b>                  | 61                      | 95                      | 36-118                     |
| <b>Cystine</b>                    | 25                      | 9                       | 9-53                       |
| <b>Lysine</b>                     | 242                     | 280                     | 122-285                    |
| <b>Tyrosine</b>                   | 103                     | 123                     | 30-100                     |
| <b>Methionine</b>                 | 34                      | 34                      | 14-41                      |
| <b>Phenylalanine</b>              | 82                      | 95                      | 35-83                      |
| <b>Alloisoleucine</b>             | <1                      | <1                      | 0-0                        |
| <b>Homocystine</b>                | <1                      | <1                      | 0-0                        |

|                   |           |           |         |
|-------------------|-----------|-----------|---------|
| <b>Valine</b>     | <b>67</b> | <b>69</b> | 108-295 |
| <b>Leucine</b>    | <b>42</b> | <b>31</b> | 60-204  |
| <b>Isoleucine</b> | <b>23</b> | <b>15</b> | 39-119  |

## Novarino et al. Table S4

**Table S4: Plasma amino acids of individuals of Family 18.** Blood from unaffecteds (U) and affecteds (A) was obtained after 10 hours fasting and was analyzed at Bioscientia Laboratories by HPLC. Values are expressed in  $\mu\text{mol/L}$ . Plasma BCAA levels of the affected patients are shown in red.

| Patient                | 18-III-1 (U) | 18-III-2 (U) | 18-IV-1 (A) | 18-IV-2 (A) | Reference Range |
|------------------------|--------------|--------------|-------------|-------------|-----------------|
| <b>Amino Acid</b>      |              |              |             |             |                 |
| Phosphoserine          | n.d.         | n.d.         | n.d.        | n.d.        | 1-30            |
| Taurine                | 85           | 53           | 87          | 52          | 10-170          |
| Phosphoethanolamine    | n.d.         | n.d.         | n.d.        | n.d.        | 0-69            |
| Aspartate              | 5            | 5            | 7           | 16          | 1-24            |
| Hydroxyproline         | n.d.         | n.d.         | 17          | 24          | 3-45            |
| Theronine              | 115          | 174          | 145         | 163         | 35-226          |
| Serine                 | 113          | 176          | 152         | 226         | 69-187          |
| Asparagine             | 49           | 60           | 69          | 64          | 23-112          |
| Glutamate              | 37           | 29           | 37          | 61          | 5-150           |
| Glutamine              | 668          | 766          | 794         | 784         | 254-823         |
| Sarcosine              | n.d.         | n.d.         | n.d.        | n.d.        | 0-9             |
| A-Aminoadipic Acid     | 3            | 3            | n.d.        | n.d.        | 0-0             |
| Proline                | 239          | 134          | 172         | 130         | 59-369          |
| Glycine                | 276          | 394          | 257         | 317         | 127-341         |
| Alanine                | 518          | 333          | 495         | 392         | 152-547         |
| Citrulline             | 42           | 46           | 39          | 46          | 1-46            |
| A-Aminobutyric Acid    | 16           | 16           | 4           | 4           | 4-31            |
| Cystine                | 21           | 17           | 15          | 14          | 5-45            |
| Cystathionine          | n.d.         | n.d.         | n.d.        | 1           | 0-3             |
| Methionine             | 30           | 27           | 33          | 30          | 7-47            |
| Ethanolamine           | n.d.         | n.d.         | n.d.        | n.d.        | 0-7             |
| Lysine                 | 193          | 208          | 259         | 227         | 48-284          |
| Tyrosine               | 76           | 60           | 123         | 97          | 24-115          |
| Phenylalanine          | 65           | 44           | 68          | 51          | 26-91           |
| B-Alanine              | n.d.         | n.d.         | n.d.        | n.d.        | 0-7             |
| B-Aminoisobutyric Acid | n.d.         | n.d.         | n.d.        | n.d.        | 0-0             |
| GABA                   | n.d.         | n.d.         | n.d.        | n.d.        | 0-0             |
| Histidine              | 88           | 71           | 95          | 102         | 41-125          |
| Arginine               | 108          | 108          | 124         | 129         | 10-140          |

|                          |      |      |           |           |        |
|--------------------------|------|------|-----------|-----------|--------|
| <b>1-Methylhistidine</b> | 19   | n.d. | 11        | 14        | 0-42   |
| <b>Tryptophan</b>        | 83   | 39   | 62        | 59        | 0-79   |
| <b>Carnosine</b>         | n.d. | n.d. | n.d.      | n.d.      | 0-0    |
| <b>Anserine</b>          | n.d. | n.d. | n.d.      | n.d.      | 0-0    |
| <b>Hydroxylysine</b>     | n.d. | n.d. | n.d.      | n.d.      | 0-2    |
| <b>Ornithine</b>         | 67   | 69   | 63        | 67        | 10-163 |
| <b>Valine</b>            | 215  | 125  | <b>57</b> | <b>54</b> | 74-321 |
| <b>Leucine</b>           | 114  | 61   | <b>21</b> | <b>22</b> | 49-216 |
| <b>Isoleucine</b>        | 58   | 33   | <b>11</b> | <b>12</b> | 22-107 |

## Novarino et al. Table S5

**Table S5: Plasma amino acids of individuals of family 1435.** Results from blood drawn on different days are reported. Plasma amino acids were quantified on bloodspot cards by FIA-MS/MS or LC-MS/MS at the Mayo Clinic. U, unaffected; A, affected. Values are expressed in nmol/ml. Plasma BCAA levels of the affected patients are shown in red.

Note: As described in the text, the Libyan revolution made it impossible to obtain dry ice shipment of plasma for amino acid analysis in Family 1435. Instead, established alternative methods of analysis were used - analysis of blood samples spotted on Guthrie cards and analyzed by FIA- or LC-MS/MS (1). As this analysis is mainly performed on newborns, Mayo Clinic does not have internal reference ranges for individuals in the older age group of those tested. While comparison with healthy siblings provides the most appropriate metric for this analysis, we provide below an additional comparator - published reference ranges from two distinguished sources. Note that these ranges were established using plasma samples analyzed by HPLC.

**Plasma amino acids by FIA-MS/MS September 2011\* (fasting status: unknown).**

| Patient                     | 1435-III-1 (U) | 1435-IV-2 (U) (19y) | 1435-IV-3 (U) (17 y) | 1435-IV-4 (U) (16 y) | 1435-IV-5 (U) (13 y) | 1435-IV-6 (A) (9 y) | 1435-IV-7 (U) (7 y) | 1435-IV-8 (A) (5 y) | 1435-IV-9 (U) (2 y) | Reference Range (2) 2-10 years | Reference Range (2) 10-18 years | Reference Range (3) 2-18 years |
|-----------------------------|----------------|---------------------|----------------------|----------------------|----------------------|---------------------|---------------------|---------------------|---------------------|--------------------------------|---------------------------------|--------------------------------|
| <b>Amino Acid</b>           |                |                     |                      |                      |                      |                     |                     |                     |                     |                                |                                 |                                |
| <b>Glycine</b>              | n.d.           | 161.5               | 243.0                | 69.2                 | 132.5                | 243.0               | 96.9                | 485.9               | 80.8                | 113-261                        | 148-324                         | 127-341                        |
| <b>Ornithine</b>            | 70.3           | 45.5                | 55.7                 | 51.0                 | 61.8                 | 59.8                | 65.3                | 66.8                | 34.9                | 24-64                          | 20-84                           | 10-163                         |
| <b>Arginine</b>             | 1.8            | 1.2                 | 1.4                  | 1.0                  | 1.6                  | 1.4                 | 1.3                 | 1.2                 | 0.8                 | 38-98                          | 45-125                          | 10-140                         |
| <b>Citrulline</b>           | 18.8           | 13.7                | 17.9                 | 16.3                 | 17.6                 | 20.3                | 18.7                | 14.4                | 13.3                | 18-50                          | 17-49                           | 1-46                           |
| <b>Alanine</b>              | 390.3          | 544.3               | 561.5                | 508.3                | 479.8                | 438.8               | 364.7               | 444.4               | 605.2               | 158-314                        | 192-508                         | 152-547                        |
| <b>Serine</b>               | 609.8          | 577.2               | 530.7                | 601.1                | 456.5                | 459.8               | 458.4               | 596.4               | 454.2               | 77-169                         | 75-175                          | 69-187                         |
| <b>Glutamate</b>            | 284.1          | 200.8               | 248.0                | 251.9                | 273.0                | 282.5               | 251.7               | 316.1               | 305.6               | 11-51                          | 11-59                           | 5-150                          |
| <b>Aspartate</b>            | 71.7           | 22.0                | 36.8                 | 41.7                 | 35.2                 | 30.0                | 33.3                | 34.4                | 17.6                | 3-15                           | 4-28                            | 1-24                           |
| <b>Threonine</b>            | 135.3          | 304.2               | 176.8                | 230.5                | 154.8                | 163.9               | 163.9               | 223.4               | 125.7               | 48-140                         | 72-192                          | 35-226                         |
| <b>Methionine</b>           | 15.5           | 22.8                | 20.0                 | 12.5                 | 23.1                 | 15.3                | 14.6                | 24.2                | 14.5                | 11-27                          | 16-36                           | 7-47                           |
| <b>Histidine</b>            | 229.8          | 223.0               | 178.3                | 167.7                | 163.2                | 163.6               | 194.8               | 199.1               | 163.3               | 54-106                         | 58-106                          | 41-125                         |
| <b>Tyrosine</b>             | 64.4           | 94.5                | 77.7                 | 72.3                 | 97.8                 | 80.7                | 73.9                | 89.0                | 82.5                | 34-82                          | 40-92                           | 24-115                         |
| <b>Valine</b>               | 242.5          | 426.9               | 174.3                | 223.3                | 255.6                | 95.5                | 187.5               | 147.3               | 166.1               | 133-273                        | 142-278                         | 74-321                         |
| <b>Leucine + Isoleucine</b> | 159.6          | 183.3               | 189.4                | 163.2                | 235.4                | 86.3                | 192.5               | 134.2               | 142.1               | N.A.                           | N.A.                            | N.A.                           |

\* Prior to spotting on cards, these repository samples were hemolyzed after being frozen at -80 degrees Celsius and undergoing several freeze-thaw cycles.

**Plasma amino acids by LC-MS/MS September 2011\* (fasting status: unknown).**

| Patient \ Amino Acid | 1435-III-1 (U) | 1435-IV-2 (U) (19 y) | 1435-IV-3 (U) (17 y) | 1435-IV-4 (U) (16 y) | 1435-IV-5 (U) (13 y) | 1435-IV-6 (A) (9 y) | 1435-IV-7 (U) (7 y) | 1435-IV-8 (A) (5 y) | 1435-IV-9 (U) (2 y) | Reference Range (2) 2-10 years | Reference Range (2) 10-18 years | Reference Range (3) 2-18 years |
|----------------------|----------------|----------------------|----------------------|----------------------|----------------------|---------------------|---------------------|---------------------|---------------------|--------------------------------|---------------------------------|--------------------------------|
| <b>Valine</b>        | 190            | 251                  | 224                  | 172                  | 235                  | 70                  | 132                 | 131                 | 167                 | 133-273                        | 142-278                         | 74-321                         |
| <b>Leucine</b>       | 165            | 196                  | 190                  | 146                  | 205                  | 73                  | 113                 | 113                 | 134                 | 64-164                         | 76-168                          | 49-216                         |
| <b>Isoleucine</b>    | 85             | 95                   | 98                   | 76                   | 119                  | 30                  | 62                  | 57                  | 80                  | 31-83                          | 38-94                           | 22-107                         |

\* Prior to spotting on cards, these repository samples were hemolyzed after being frozen at -80 degrees Celsius and undergoing several freeze-thaw cycles.

**Plasma amino acids by FIA-MS/MS December 2011 (fasting for 12 hours).**

| Patient \ Amino Acid        | 1435-IV-5 (U) (14 y) | 1435-IV-6 (A) (10 y) | 1435-IV-7 (U) (8 y) | 1435-IV-8 (A) (6 y) | Reference Range (2) 2-10 years | Reference Range (2) 10-18 years | Reference Range (3) 2-18 years |
|-----------------------------|----------------------|----------------------|---------------------|---------------------|--------------------------------|---------------------------------|--------------------------------|
| <b>Glycine</b>              | 214.1                | 247.5                | 196.4               | 239.6               | 113-261                        | 148-324                         | 127-341                        |
| <b>Ornithine</b>            | 22.6                 | 19.3                 | 21.5                | 19.8                | 24-64                          | 20-84                           | 10-163                         |
| <b>Arginine</b>             | 2.9                  | 3.0                  | 2.5                 | 2.0                 | 38-98                          | 45-125                          | 10-140                         |
| <b>Citrulline</b>           | 17.2                 | 17.5                 | 21.7                | 15.9                | 18-50                          | 17-49                           | 1-46                           |
| <b>HomoCitrulline</b>       | 1.7                  | 1.9                  | 1.1                 | 0.8                 | N.A.                           | N.A.                            | N.A.                           |
| <b>Alanine</b>              | 396.4                | 271.7                | 341.6               | 389.3               | 158-314                        | 192-508                         | 152-547                        |
| <b>Tyrosine</b>             | 60.0                 | 71.4                 | 62.2                | 63.3                | 34-82                          | 40-92                           | 24-115                         |
| <b>Serine</b>               | 151.4                | 168.2                | 165.2               | 150.2               | 77-169                         | 75-175                          | 69-187                         |
| <b>Glutamate</b>            | 203.6                | 169.8                | 137.0               | 162.4               | 11-51                          | 11-59                           | 5-150                          |
| <b>Threonine</b>            | 26.4                 | 46.0                 | 61.0                | 57.0                | 48-140                         | 72-192                          | 35-226                         |
| <b>Aspartate</b>            | 61.6                 | 67.2                 | 38.5                | 63.4                | 3-15                           | 4-28                            | 1-24                           |
| <b>Methionine</b>           | 16.2                 | 18.2                 | 13.3                | 19.6                | 11-27                          | 16-36                           | 7-47                           |
| <b>Histidine</b>            | 23.1                 | 14.2                 | 14.1                | 14.0                | 54-106                         | 58-106                          | 41-125                         |
| <b>Phenylalanine</b>        | 55.3                 | 63.1                 | 49.2                | 69.1                | 35-67                          | 38-78                           | 26-91                          |
| <b>Valine</b>               | 123.3                | 71.7                 | 174.1               | 75.0                | 133-273                        | 142-278                         | 74-321                         |
| <b>Leucine + Isoleucine</b> | 127.8                | 79.3                 | 159.3               | 66.4                | N.A.                           | N.A.                            | N.A.                           |

**Plasma amino acids by LC-MS/MS December 2011 (fasting for 12 hours).**

| <b>Patient</b>    | <b>1435-IV-5<br/>(U) (14 y)</b> | <b>1435-IV-6<br/>(A) (10 y)</b> | <b>1435-IV-7<br/>(U) (8 y)</b> | <b>1435-IV-8<br/>(A) (6 y)</b> | <b>Reference<br/>Range (2)<br/>2-10 years</b> | <b>Reference<br/>Range (2)<br/>10-18<br/>years</b> | <b>Reference<br/>Range (3)<br/>2-18 years</b> |
|-------------------|---------------------------------|---------------------------------|--------------------------------|--------------------------------|-----------------------------------------------|----------------------------------------------------|-----------------------------------------------|
| <b>Valine</b>     | 154.0                           | 100.0                           | 216.0                          | 80.0                           | 133-273                                       | 142-278                                            | 74-321                                        |
| <b>Leucine</b>    | 93.0                            | 64.0                            | 120.0                          | 47.0                           | 64-164                                        | 76-168                                             | 49-216                                        |
| <b>Isoleucine</b> | 60.0                            | 34.0                            | 94.0                           | 32.0                           | 31-83                                         | 38-94                                              | 22-107                                        |

1. Oglesbee, D. *et al.*, Second-Tier Test for Quantification of Alloisoleucine and Branched-Chain Amino Acids in Dried Blood Spots to Improve Newborn Screening for Maple Syrup Urine Disease (Msud). *Clinical chemistry* 54, 542 (2008).
2. Blau, N., Duran, M., Gibson, M. K., *Laboratory Guide to the Methods in Biochemical Genetics*. (Springer, ed. 1st edition, 2008).
3. Shapira, E., Blitzer, M. G., Miller, J. B., Affrick, D. K., *Biochemical Genetics: A Laboratory Manual*. (Oxford University Press, 1989).



## Novarino et al. Table S6

**Table S6: Urine amino acid profile.** Urine amino acids were determined for the two affecteds from Family 558 and for all the members of Family 18. Values are expressed as nmol/mg of creatinine. n.d.: not determined.

### Family 558

| Patient        | 558-IV-2 (A) | 558-IV-3 (A) |
|----------------|--------------|--------------|
| Amino Acid     |              |              |
| Phosphoserine  | 0            | 0            |
| Taurine        | 533          | 1074         |
| Aspartic acid  | 70           | 128          |
| Serine         | 267          | 374          |
| Hydroxyproline | 94           | 2            |
| Glycine        | 3727         | 2141         |
| Glutamine      | 355          | 709          |
| Asparagine     | 1            | 2            |
| Histidine      | 538          | 913          |
| Threonine      | 123          | 228          |
| Citrulline     | 2            | 4            |
| Sarcosine      | 1            | 0            |
| B-alanine      | 5            | 7            |
| Alanine        | 595          | 578          |
| Glutamate      | 6            | 9            |
| Carnosine      | 3            | 9            |
| Arginine       | 44           | 65           |
| GABA           | 1            | 2            |
| Proline        | 37           | 4            |
| Ornithine      | 2            | 4            |
| Cysteine       | 17           | 28           |
| Lysine         | 37           | 167          |
| Methionine     | 10           | 11           |
| Tryptophan     | 72           | 124          |
| Tyrosine       | 103          | 189          |
| Isoleucine     | 1            | 2            |
| Valine         | 8            | 9            |
| Leucine        | 3            | 7            |
| Isoleucine     | 1            | 2            |

**Family 18**

| <b>Patient</b><br><b>Amino Acid</b> | <b>18-III-1 (U)</b> | <b>Reference Range</b> | <b>18-III-2 (U)</b> | <b>Reference Range</b> | <b>18-IV-1 (A)</b> | <b>Reference Range</b> | <b>18-IV-2 (A)</b> | <b>Reference Range</b> |
|-------------------------------------|---------------------|------------------------|---------------------|------------------------|--------------------|------------------------|--------------------|------------------------|
| <b>Phosphoserine</b>                | n.d.                | (0-0)                  | n.d.                | (0-0)                  | n.d.               | (0-0)                  | n.d.               | (0-0)                  |
| <b>Taurine</b>                      | 56                  | (16-180)               | 117                 | (16-180)               | 70                 | (18-230)               | 108                | (17-230)               |
| <b>Aspartic acid</b>                | n.d.                | (2-7)                  | n.d.                | (2-7)                  | n.d.               | (1-10)                 | n.d.               | (2-8)                  |
| <b>Hydroxyproline</b>               | n.d.                | (0-13)                 | n.d.                | (0-13)                 | n.d.               | (0-13)                 | n.d.               | (0-13)                 |
| <b>Threonine</b>                    | 14                  | (7-29)                 | 19                  | (7-29)                 | 44                 | (8-28)                 | 57                 | (9-36)                 |
| <b>Serine</b>                       | 32                  | (21-50)                | 61                  | (21-50)                | 84                 | (23-69)                | 104                | (38-93)                |
| <b>Asparagine</b>                   | 13                  | (0-23)                 | 20                  | (0-23)                 | 43                 | (0-24)                 | 41                 | (0-29)                 |
| <b>Glutamic acid</b>                | 3                   | (0-12)                 | 3                   | (0-12)                 | 3                  | (0-9)                  | 3                  | (0-8)                  |
| <b>Glutamine</b>                    | 50                  | (20-76)                | 95                  | (20-76)                | 149                | (20-112)               | 144                | (52-133)               |
| <b>Sarcosine</b>                    | n.d.                | (0-0)                  | n.d.                | (0-0)                  | n.d.               | (0-0)                  | n.d.               | (0-0)                  |
| <b>Proline</b>                      | n.d.                | (0-9)                  | 1                   | (0-9)                  | 1                  | (0-9)                  | 1                  | (0-9)                  |
| <b>Glycine</b>                      | 104                 | (43-173)               | 310                 | (43-173)               | 184                | (64-236)               | 278                | (91-246)               |
| <b>Alanine</b>                      | 41                  | (16-68)                | 46                  | (16-68)                | 101                | (17-65)                | 133                | (27-92)                |
| <b>Citrulline</b>                   | 1                   | (0-4)                  | 1                   | (0-4)                  | 1                  | (0-5)                  | 1                  | (0-5)                  |
| <b>Valine</b>                       | 4                   | (3-13)                 | 3                   | (3-13)                 | 3                  | (3-17)                 | 4                  | (3-15)                 |
| <b>Cystine</b>                      | 4                   | (3-17)                 | 4                   | (3-17)                 | 4                  | (4-12)                 | 4                  | (4-11)                 |
| <b>Cystathionine</b>                | n.d.                | (0-0)                  | n.d.                | (0-0)                  | n.d.               | (0-0)                  | n.d.               | (0-0)                  |
| <b>Methionine</b>                   | 1                   | (2-16)                 | 2                   | (2-16)                 | 3                  | (3-17)                 | 3                  | (5-20)                 |
| <b>Isoleucine</b>                   | 2                   | (0-4)                  | 1                   | (0-4)                  | n.d.               | (0-6)                  | 1                  | (0-5)                  |
| <b>Leucine</b>                      | 4                   | (2-11)                 | 4                   | (2-11)                 | 3                  | (3-16)                 | 3                  | (3-13)                 |
| <b>Tyrosine</b>                     | 22                  | (2-23)                 | 10                  | (2-23)                 | 29                 | (6-26)                 | 23                 | (9-35)                 |
| <b>Phenylalanine</b>                | 9                   | (2-19)                 | 5                   | (2-19)                 | 14                 | (5-20)                 | 10                 | (6-26)                 |
| <b>B-Alanine</b>                    | n.d.                | (0-0)                  | n.d.                | (0-0)                  | n.d.               | (0-0)                  | n.d.               | (0-0)                  |
| <b>GABA</b>                         | n.d.                | (0-0)                  | n.d.                | (0-0)                  | n.d.               | (0-0)                  | n.d.               | (0-0)                  |
| <b>Histidine</b>                    | 71                  | (26-153)               | 91                  | (26-153)               | 224                | (43-184)               | 169                | (61-216)               |
| <b>Tryptophan</b>                   | n.d.                | (0-0)                  | n.d.                | (0-0)                  | n.d.               | (0-0)                  | n.d.               | (0-0)                  |
| <b>Carnosine</b>                    | n.d.                | (0-0)                  | n.d.                | (0-0)                  | n.d.               | (0-0)                  | n.d.               | (0-0)                  |
| <b>Anserine</b>                     | n.d.                | (0-0)                  | n.d.                | (0-0)                  | n.d.               | (0-0)                  | n.d.               | (0-0)                  |
| <b>Hydroxylysine</b>                | n.d.                | (0-0)                  | n.d.                | (0-0)                  | n.d.               | (0-0)                  | n.d.               | (0-0)                  |
| <b>Ornithine</b>                    | 3                   | (0-5)                  | 2                   | (0-5)                  | 3                  | (0-6)                  | 3                  | (0-7)                  |
| <b>Lysine</b>                       | 8                   | (7-58)                 | 10                  | (7-58)                 | 32                 | (10-56)                | 17                 | (10-68)                |
| <b>Ethanolamine</b>                 | n.d.                | (0-0)                  | n.d.                | (0-0)                  | n.d.               | (0-0)                  | n.d.               | (0-0)                  |
| <b>Arginine</b>                     | 2                   | (0-5)                  | 2                   | (0-5)                  | 4                  | (0-6)                  | 3                  | (0-7)                  |

# Novarino et al. Table S7

**Table S7: Plasma organic acids are low in patients with a BCKDK nonsense mutation.** Plasma organic acids of siblings of Family-558. Values are given in umol/L. Age matched control are shown as references (blood drawn after 14 hours fasting and analyzed at Baylor Research Institute).

| Organic Acid               | 558-IV-1 (U) | 558-IV-2 (A) | 558-IV-3 (A) | Age matched female controls |          |          |
|----------------------------|--------------|--------------|--------------|-----------------------------|----------|----------|
|                            |              |              |              | 16 years                    | 17 years | 18 years |
| Glyoxylic                  | 0            | 0            | 0            | 0                           | 0        | 0        |
| Pyruvic                    | 111          | 86           | 134          | 85                          | 44       | 86       |
| 2-Oxoisovaleric            | 10           | 0            | 0            | 16                          | 11       | 17       |
| Acetoacetic                | 0            | 0            | 0            | 0                           | 0        | 0        |
| 2-Oxo-3-methylvaleric      | 0            | 0            | 0            | 26                          | 15       | 23       |
| 2-Methylacetoacetic        | 0            | 0            | 0            | 0                           | 0        | 0        |
| 2-Oxoisocaproic            | 22           | 0            | 0            | 25                          | 28       | 18       |
| 2-Oxoglutaric              | 0            | 0            | 0            | 0                           | 0        | 0        |
| 2-Oxoadipic                | 0            | 0            | 0            | 0                           | 0        | 0        |
| 4-Hydroxyphenylpyruvic     | 0            | 0            | 0            | 0                           | 0        | 0        |
| Succinylacetone            | 0            | 0            | 0            | 0                           | 0        | 0        |
| Lactic                     | 1554         | 1110         | 1729         | >2000                       | >2000    | >2000    |
| Glycolic                   | 35           | 0            | 0            | 50                          | 123      | 34       |
| 2-Hydroxybutyric           | 5            | 7            | 0            | 129                         | 60       | 72       |
| 3-Hydroxypropionic         | 15           | 1            | 0            | 6                           | 8        | 3        |
| 3-Hydroxyisobutyric        | 25           | 13           | 20           | 29                          | 9        | 9        |
| 3-Hydroxybutyric           | 0            | 16           | 17           | 28                          | 33       | 170      |
| 2-Hydroxyisovaleric        | 0            | 0            | 0            | 0                           | 0        | 0        |
| Heptanoic                  | 0            | 0            | 0            | 0                           | 0        | 0        |
| 2-Methyl-3-Hydroxybutyric  | 0            | 0            | 0            | 0                           | 0        | 0        |
| 3-Hydroxyisovaleric        | 0            | 0            | 0            | 9                           | 18       | 5        |
| Methylmalonic              | 0            | 0            | 0            | 0                           | 0        | 0        |
| 2-Hydroxyisocaproic        | 0            | 0            | 0            | 0                           | 0        | 0        |
| 2-Ethyl-3-Hydroxypropionic | 6            | 0            | 4            | 10                          | 0        | 8        |
| 3-Hydroxyvaleric           | 0            | 0            | 0            | 0                           | 0        | 0        |
| 4-Hydroxybutyric           | 0            | 0            | 0            | 0                           | 0        | 0        |
| 2-Hydroxy-3-Methylvaleric  | 0            | 0            | 0            | 0                           | 0        | 0        |
| Benzoic                    | 5            | 7            | 2            | 9                           | 23       | 5        |
| 4-Hydroxyisovaleric        | 0            | 0            | 0            | 0                           | 0        | 0        |
| Octanoic                   | 0            | 0            | 0            | 18                          | 0        | 5        |
| 2-Methyl-3-Hydroxyvaleric  | 0            | 0            | 0            | 0                           | 0        | 0        |
| Ethylmalonic               | 0            | 0            | 0            | 0                           | 0        | 0        |
| Phenylacetic               | 0            | 0            | 0            | 0                           | 0        | 0        |
| Succinic                   | 1            | 1            | 1            | 4                           | 6        | 11       |
| Methylsuccinic             | 0            | 0            | 0            | 0                           | 0        | 0        |
| Glyceric                   | 9            | 10           | 5            | 12                          | 63       | 19       |
| Uracil                     | 0            | 0            | 0            | 0                           | 0        | 0        |
| Fumaric                    | 2            | 2            | 2            | 4                           | 0        | 5        |
| 5-Hydroxyhexanoic          | 0            | 0            | 0            | 0                           | 0        | 0        |

|                            |    |    |    |    |     |    |
|----------------------------|----|----|----|----|-----|----|
| Thymine                    | 0  | 0  | 0  | 0  | 0   | 0  |
| Glutaric                   | 1  | 1  | 1  | 0  | 0   | 0  |
| Propionylglycine           | 0  | 0  | 0  | 0  | 0   | 0  |
| Isobutyrylglycine          | 0  | 0  | 0  | 0  | 0   | 0  |
| Malonic                    | 0  | 0  | 0  | 0  | 0   | 0  |
| 3-Methylglutaric           | 0  | 0  | 0  | 0  | 0   | 0  |
| cis4-Decenoic              | 0  | 0  | 0  | 0  | 0   | 0  |
| Decanoic                   | 0  | 0  | 0  | 3  | 4   | 13 |
| 3-Hydroxyoctanoic          | 0  | 0  | 0  | 0  | 0   | 0  |
| Butyrylglycine             | 0  | 0  | 0  | 0  | 0   | 0  |
| Malic                      | 4  | 2  | 3  | 5  | 6   | 23 |
| 2-Methylbutyrylglycine     | 0  | 0  | 0  | 0  | 0   | 0  |
| Adipic                     | 0  | 0  | 0  | 0  | 1   | 0  |
| Isovalerylglycine          | 0  | 0  | 0  | 0  | 0   | 0  |
| 5-Oxoproline               | 53 | 32 | 25 | 18 | 31  | 43 |
| 2-Hydroxyphenylacetic      | 0  | 0  | 0  | 0  | 0   | 0  |
| 3-Methyladipic             | 0  | 0  | 0  | 0  | 0   | 0  |
| Mevalonic                  | 0  | 0  | 0  | 0  | 0   | 0  |
| 3-Methylcrotonylglycine    | 0  | 0  | 0  | 0  | 0   | 0  |
| 2-Hydroxyglutaric          | 2  | 2  | 2  | 0  | 0   | 0  |
| 3-Hydroxyglutaric          | 0  | 0  | 0  | 0  | 0   | 0  |
| Tiglylglycine              | 0  | 0  | 0  | 0  | 0   | 0  |
| Phenyllactic               | 0  | 0  | 0  | 0  | 0   | 0  |
| 3-Hydroxy-3-methylglutaric | 0  | 0  | 0  | 0  | 0   | 0  |
| Pimelic                    | 0  | 0  | 0  | 0  | 0   | 0  |
| 4-Hydroxycyclohexylacetic  | 0  | 0  | 0  | 0  | 0   | 0  |
| Hexanoylglycine            | 0  | 0  | 0  | 0  | 0   | 0  |
| 4-Hydroxyphenylacetic      | 2  | 0  | 0  | 0  | 0   | 0  |
| 3-Hydroxydecanoic          | 0  | 0  | 0  | 0  | 0   | 0  |
| Lauric                     | 13 | 9  | 9  | 6  | 36  | 5  |
| N-acetylaspartic           | 0  | 0  | 0  | 0  | 0   | 0  |
| 2-Hydroxyadipic            | 0  | 0  | 0  | 0  | 0   | 0  |
| 5-Hydroxymethyluracil      | 0  | 0  | 0  | 0  | 0   | 0  |
| 3-Hydroxyadipic            | 0  | 0  | 0  | 0  | 0   | 0  |
| 3-Methylglutaconic         | 0  | 0  | 0  | 0  | 0   | 0  |
| Suberic                    | 0  | 0  | 0  | 0  | 0   | 0  |
| Orotic                     | 0  | 0  | 0  | 0  | 0   | 0  |
| Glutaconic                 | 0  | 0  | 0  | 0  | 0   | 0  |
| Aconitic                   | 6  | 0  | 0  | 0  | 3   | 0  |
| Azelaic                    | 0  | 0  | 0  | 0  | 0   | 0  |
| Isocitric                  | 5  | 5  | 5  | 8  | 11  | 9  |
| Citric                     | 80 | 44 | 49 | 20 | 124 | 97 |
| 3-Hydroxydodecanoic        | 0  | 0  | 0  | 0  | 0   | 0  |
| Methylcitric               | 0  | 0  | 0  | 0  | 0   | 0  |
| Hippuric                   | 0  | 0  | 0  | 0  | 0   | 0  |
| Myristic                   | 56 | 15 | 12 | 20 | 123 | 14 |
| Sebacic                    | 2  | 0  | 2  | 0  | 0   | 0  |
| 4-Hydroxyphenyllactic      | 4  | 4  | 4  | 4  | 3   | 3  |
| Xanthine                   | 0  | 0  | 0  | 0  | 0   | 0  |
| Phenylpropionylglycine     | 0  | 0  | 0  | 0  | 0   | 0  |
| Palmitoleic                | 49 | 26 | 25 | 29 | 180 | 40 |
| 3-Hydroxytetradecanoic     | 0  | 0  | 0  | 0  | 0   | 0  |
| 2-Hydroxydecanedioic       | 0  | 0  | 0  | 0  | 0   | 0  |

|                              |     |     |     |     |      |     |
|------------------------------|-----|-----|-----|-----|------|-----|
| <b>Palmitic</b>              | 887 | 480 | 333 | 704 | 1787 | 401 |
| <b>3-Hydroxydecanedioic</b>  | 0   | 0   | 0   | 0   | 0    | 0   |
| <b>N-Acetyltyrosine</b>      | 0   | 0   | 0   | 0   | 0    | 0   |
| <b>3-Hydroxyhexadecanoic</b> | 0   | 0   | 0   | 0   | 0    | 0   |
| <b>Linoleic</b>              | 585 | 497 | 215 | 372 | 1702 | 405 |
| <b>Oleic</b>                 | 628 | 450 | 289 | 579 | 990  | 571 |
| <b>Stearic</b>               | 124 | 51  | 47  | 102 | 157  | 87  |
| <b>Suberylglycine</b>        | 0   | 0   | 0   | 0   | 0    | 0   |

# Novarino et al. Table S8

## Anthropomorphic Data on Affected Individuals

| Patient and Age     | Head Circumference (cm) | Head Circumference (Percentile*) | Height (cm) | Height (Percentile**) | Weight (Kg) | Weight (Percentile**) |
|---------------------|-------------------------|----------------------------------|-------------|-----------------------|-------------|-----------------------|
| 558-IV-2, 15 years  | 49                      | -3SD                             | N/A         | N/A                   | N/A         | N/A                   |
| 558-IV-3, 11 years  | 51.7                    | 25th                             | N/A         | N/A                   | N/A         | N/A                   |
| 18-IV-I, 36 months  | 47                      | 5th***                           | 98          | 83rd                  | 15          | 75th                  |
| 18-IV-I, 69 months  | 52                      | 76th                             | N/A         | N/A                   | N/A         | N/A                   |
| 18-IV-I, 96 months  | 52.5                    | 75th                             | 130         | 64th                  | 34.5        | 93rd                  |
| 18-IV-II, 61 months | 50                      | 18th                             | 110         | 57                    | 22          | 85                    |
| 1435-IV-6, 9 years  | 47.5                    | -2SD                             | N/A         | N/A                   | N/A         | N/A                   |
| 1435-IV-8, 5 years  | 47                      | -3SD                             | N/A         | N/A                   | N/A         | N/A                   |

\*Based on United States Head Circumference Growth Reference Charts for Children 0 to 21 years of Age.(Rollins, Collins et al. 2010)

\*\*Based on Centers for Disease Control (CDC) height and weight for age for girls (2-20 years)

\*\*\* -1 Standard Deviation according to World Health Organization head circumference for age for girls birth to 5 years and CDC Head Circumference for age (0-36 months)

## Novarino et al. Table S9

**Table S9: Prospective dietary records of affected individuals.** Dietary Information obtained when 18-IV-1 was 8 years old. She weighed 34.5 Kg and had a height of 130 cm. Dietary Information obtained when 18-IV-2 was 5 years old. He weighed 22 Kg and had a height of 110 cm. Data were obtained by prospective monitoring and report by parents. Abbreviations: RDA is the recommended daily allowance (WHO/FAO/UNU, 2004).

| Item                     | EGT 18-IV-1 Mean Three Day Record |      | EGT 18-IV-2 Mean Three Day Record |      |
|--------------------------|-----------------------------------|------|-----------------------------------|------|
|                          | Intake                            | RDA  | Intake                            | RDA  |
| <b>Energy (Kcal/day)</b> | 2144.60                           | 1830 | 1567.56                           | 1467 |
| <b>CHO (g/day)</b>       | 297.28                            | 130  | 223.34                            | 130  |
| <b>Protein (g/day)</b>   | 75.93                             | 26.2 | 55.32                             | 17.1 |
| <b>Fat (g/day)</b>       | 76.86                             | ND   | 58.98                             | ND   |
| <b>Fiber (g/day)</b>     | 8.94                              | 25   | 5.41                              | 25   |

# Novarino et al. Table S10

**Table S10: Plasma amino acids of individuals from families 558 and 18 before and during BCAA dietary supplementation.** The amount of supplementation is indicated as grams of BCAA supplement per patient body weight (in Kg) per day. Samples from Family 558 and 18 were quantified by HPLC and by FIA-MS/MS or LC-MS/MS, respectively (Mayo Clinic).

## Patient 558-IV-2

| Condition<br>Amino Acid | Prior to supplementation |                                   | Supplemented with<br>0.6 g/Kg/day |                                   | Supplemented with<br>1 g/Kg/day |                                   | Reference<br>Range |
|-------------------------|--------------------------|-----------------------------------|-----------------------------------|-----------------------------------|---------------------------------|-----------------------------------|--------------------|
|                         | Fasting<br>(14 hrs)      | Post meal and<br>supplement (1hr) | Fasting<br>(14 hrs)               | Post meal and<br>supplement (1hr) | Fasting<br>(14 hrs)             | Post meal and<br>supplement (1hr) |                    |
| Taurine                 | 75                       | 85                                | 80                                | 69                                | 73                              | 87                                | 54-210             |
| Asparagine              | 69                       | 73                                | 54                                | 69                                | 66                              | 50                                | 35-74              |
| Serine                  | 129                      | 138                               | 144                               | 163                               | 161                             | 121                               | 58-181             |
| Glycine                 | 293                      | 269                               | 292                               | 250                               | 281                             | 185                               | 151-490            |
| Glutamine               | 571                      | 568                               | 595                               | 631                               | 580                             | 569                               | 205-756            |
| Histidine               | 100                      | 92                                | 80                                | 90                                | 104                             | 87                                | 72-124             |
| Threonine               | 181                      | 169                               | 173                               | 181                               | 145                             | 119                               | 60-225             |
| Citrulline              | 29                       | 24                                | 32                                | 23                                | 33                              | 44                                | 12-55              |
| Alanine                 | 750                      | 665                               | 464                               | 456                               | 557                             | 491                               | 177-583            |
| Glutamate               | 40                       | 57                                | 42                                | 39                                | 35                              | 51                                | 10-131             |
| Arginine                | 137                      | 150                               | 104                               | 137                               | 115                             | 152                               | 15-128             |
| Proline                 | 395                      | 398                               | 234                               | 337                               | 293                             | 276                               | 97-329             |
| Ornithine               | 47                       | 48                                | 47                                | 55                                | 42                              | 43                                | 48-195             |
| Cysteine                | 55                       | 51                                | 41                                | 53                                | 71                              | 55                                | 5-82               |
| Lysine                  | 235                      | 224                               | 186                               | 258                               | 205                             | 224                               | 116-295            |
| Methionine              | 32                       | 33                                | 31                                | 37                                | 39                              | 32                                | 10-42              |
| Tyrosine                | 103                      | 104                               | 101                               | 127                               | 123                             | 103                               | 34-112             |
| Phenylalanine           | 56                       | 58                                | 51                                | 62                                | 67                              | 52                                | 35-85              |
| <b>Valine</b>           | <b>57</b>                | <b>77</b>                         | <b>54</b>                         | <b>101</b>                        | <b>79</b>                       | <b>809</b>                        | <b>119-336</b>     |
| <b>Leucine</b>          | <b>20</b>                | <b>32</b>                         | <b>24</b>                         | <b>61</b>                         | <b>29</b>                       | <b>809</b>                        | <b>72-201</b>      |
| <b>Isoleucine</b>       | <b>10</b>                | <b>18</b>                         | <b>12</b>                         | <b>31</b>                         | <b>15</b>                       | <b>401</b>                        | <b>30-108</b>      |



**Patient 558-IV-3**

| Condition<br>Amino Acid | Prior to supplementation |                                   | Supplemented with<br>0.6 g/Kg/day |                                   | Supplemented with<br>1 g/Kg/day |                                   | Reference<br>Range |
|-------------------------|--------------------------|-----------------------------------|-----------------------------------|-----------------------------------|---------------------------------|-----------------------------------|--------------------|
|                         | Fasting<br>(14 hrs)      | Post meal and<br>supplement (1hr) | Fasting<br>(14 hrs)               | Post meal and<br>supplement (1hr) | Fasting<br>(14 hrs)             | Post meal and<br>supplement (1hr) |                    |
| <b>Taurine</b>          | 94                       | 79                                | 71                                | 61                                | 64                              | 73                                | 54-210             |
| <b>Asparagine</b>       | 46                       | 55                                | 49                                | 59                                | 46                              | 37                                | 35-74              |
| <b>Serine</b>           | 93                       | 105                               | 143                               | 150                               | 117                             | 100                               | 58-181             |
| <b>Glycine</b>          | 164                      | 168                               | 220                               | 205                               | 153                             | 114                               | 151-490            |
| <b>Glutamine</b>        | 530                      | 531                               | 519                               | 573                               | 470                             | 442                               | 205-756            |
| <b>Histidine</b>        | 69                       | 84                                | 74                                | 79                                | 70                              | 64                                | 72-124             |
| <b>Threonine</b>        | 137                      | 167                               | 161                               | 160                               | 105                             | 88                                | 60-225             |
| <b>Citrulline</b>       | 26                       | 24                                | 34                                | 22                                | 35                              | 34                                | 12-55              |
| <b>Alanine</b>          | 489                      | 498                               | 420                               | 501                               | 344                             | 325                               | 177-583            |
| <b>Glutamate</b>        | 54                       | 56                                | 42                                | 39                                | 32                              | 32                                | 10-131             |
| <b>Arginine</b>         | 121                      | 144                               | 108                               | 138                               | 96                              | 108                               | 15-128             |
| <b>Proline</b>          | 211                      | 264                               | 168                               | 245                               | 157                             | 153                               | 97-329             |
| <b>Ornithine</b>        | 53                       | 57                                | 69                                | 78                                | 43                              | 44                                | 48-195             |
| <b>Cysteine</b>         | 44                       | 40                                | 41                                | 45                                | 46                              | 42                                | 5-82               |
| <b>Lysine</b>           | 203                      | 230                               | 240                               | 266                               | 190                             | 188                               | 116-295            |
| <b>Methionine</b>       | 22                       | 25                                | 31                                | 31                                | 28                              | 17                                | 10-42              |
| <b>Tyrosine</b>         | 97                       | 103                               | 106                               | 109                               | 96                              | 85                                | 34-112             |
| <b>Phenylalanine</b>    | 60                       | 70                                | 68                                | 78                                | 70                              | 59                                | 35-85              |
| <b>Valine</b>           | 54                       | 74                                | 67                                | 81                                | 69                              | 837                               | 119-336            |
| <b>Leucine</b>          | 18                       | 36                                | 26                                | 44                                | 26                              | 666                               | 72-201             |
| <b>Isoleucine</b>       | 10                       | 25                                | 13                                | 24                                | 13                              | 397                               | 30-108             |

**Patient 18-IV-1**

| Condition<br>Amino Acid | Prior to supplementation | Supplemented with 0.5 g/Kg/day | Supplemented with 0.7g /Kg/day |                          |            | Reference Range |                 |
|-------------------------|--------------------------|--------------------------------|--------------------------------|--------------------------|------------|-----------------|-----------------|
|                         | Fasting (8 hrs)          | Fasting (8 hrs)                | Fasting (8 hrs)                | Post meal and supplement |            |                 |                 |
|                         |                          |                                |                                | 1hr                      | 2 hrs      | 4 hrs           |                 |
| Hydroxyproline          | na                       | na                             | na                             | na                       | na         | na              | 3-45            |
| Threonine               | 51.3                     | 37.4                           | 36                             | 31                       | 33         | 31              | 35-226          |
| Serine                  | 202.7                    | 132.2                          | 240                            | 210                      | 245        | 277             | 69-187          |
| Asparagine              | na                       | na                             | na                             | na                       | na         | na              | 23-112          |
| Glutamate               | 116.9                    | 128.4                          | 117                            | 125                      | 109        | 143             | 5-150           |
| Glutamine               | na                       | na                             | na                             | na                       | na         | na              | 254-823         |
| Proline                 | na                       | na                             | na                             | na                       | na         | na              | 59-369          |
| Glycine                 | 269.8                    | 148.6                          | 146                            | 132                      | 133        | 160             | 127-341         |
| Alanine                 | 436.8                    | 329.1                          | 399                            | 362                      | 396        | 454             | 152-547         |
| Citruline               | 12.9                     | 13.4                           | 16                             | 17                       | 17         | 17              | 1-46            |
| Methionine              | 20.6                     | 19.7                           | 31                             | 22                       | 22         | 18              | 7-47            |
| Cyatathionine           | na                       | na                             | na                             | na                       | na         | na              | 0-3             |
| Tyrosine                | 102                      | 83.7                           | 68                             | 67                       | 75         | 75              | 24-115          |
| Phenylalanine           | 45.9                     | 44.6                           | 53                             | 53                       | 57         | 61              | 26-91           |
| Homocitruline           | 0.6                      | 0.8                            | 1                              | 1                        | 1          | 1               | <2              |
| Ethanolamine            | na                       | na                             | na                             | na                       | na         | na              | 0 - 7           |
| Ornithine               | 24                       | 25.6                           | 32                             | 31                       | 33         | 41              | 10-163          |
| Lysine                  | na                       | na                             | na                             | na                       | na         | na              | 48-284          |
| Histidine               | 32                       | 85.2                           | 115                            | 102                      | 80         | 84              | 41- 125         |
| Tryptophan              | na                       | na                             | na                             | na                       | na         | na              | 0-79            |
| Arginine                | 13.3                     | 3.7                            | 12                             | 15                       | 13         | 12              | 10-140          |
| <b>Valine</b>           | <b>35</b>                | <b>44</b>                      | <b>71</b>                      | <b>644</b>               | <b>443</b> | <b>185</b>      | <b>74 - 321</b> |
| <b>Leucine</b>          | <b>17</b>                | <b>18</b>                      | <b>27</b>                      | <b>329</b>               | <b>168</b> | <b>59</b>       | <b>49 - 216</b> |
| <b>Isoleucine</b>       | <b>11</b>                | <b>11</b>                      | <b>17</b>                      | <b>434</b>               | <b>168</b> | <b>49</b>       | <b>22 -107</b>  |

**Patient 18-IV-2**

| Condition<br>Amino Acid | Prior to supplementation | Supplemented with 0.64 g/Kg/day | Supplemented with 0.8 g/Kg/day |                          |            | Reference Range |                 |
|-------------------------|--------------------------|---------------------------------|--------------------------------|--------------------------|------------|-----------------|-----------------|
|                         | Fasting (8 hrs)          | Fasting (8 hrs)                 | Fasting (8 hrs)                | Post meal and supplement |            |                 |                 |
|                         |                          |                                 |                                | 1hr                      | 2 hrs      |                 | 4 hrs           |
| Hydroxyproline          | na                       | na                              | na                             | na                       | na         | 3-45            |                 |
| Threonine               | 76                       | 38.7                            | 36                             | 53                       | 53         | 36              | 35-226          |
| Serine                  | 201.8                    | 156.3                           | 335                            | 285                      | 289        | 340             | 69-187          |
| Asparagine              | na                       | na                              | na                             | na                       | na         | na              | 23-112          |
| Glutamic acid           | 121.4                    | 117.9                           | 123                            | 126                      | 130        | 137             | 5-150           |
| Glutamine               | na                       | na                              | na                             | na                       | na         | na              | 254-823         |
| Proline                 | na                       | na                              | na                             | na                       | na         | na              | 59-369          |
| Glycine                 | 37.5                     | 123                             | 143                            | 129                      | 132        | 135             | 127-341         |
| Alanine                 | 321.6                    | 215.7                           | 282                            | 273                      | 373        | 317             | 152-547         |
| Citruline               | 13.8                     | 10.3                            | 16                             | 16                       | 17         | 17              | 1-46            |
| Methionine              | 20.3                     | 18.3                            | 24                             | 27                       | 21         | 17              | 7-47            |
| Cyatathionine           | na                       | na                              | na                             | na                       | na         | na              | 0-3             |
| Tyrosine                | 68.1                     | 55.5                            | 63                             | 92                       | 81         | 43              | 24-115          |
| Phenylalanine           | 37.6                     | 43.2                            | 53                             | 67                       | 62         | 41              | 26-91           |
| Homocitruline           | 0.6                      | 0.8                             | 1                              | 1                        | 1          | 1               | <2              |
| Ethanolamine            | na                       | na                              | na                             | na                       | na         | na              | 0 - 7           |
| Ornithine               | 22.2                     | 19.3                            | 31                             | 33                       | 35         | 30              | 10-163          |
| Lysine                  | na                       | na                              | na                             | na                       | na         | na              | 48-284          |
| Histidine               | 25.8                     | 112.9                           | 108                            | 102                      | 83         | 83              | 41- 125         |
| Tryptophan              | na                       | na                              | na                             | na                       | na         | na              | 0-79            |
| Arginine                | 16.2                     | 2.8                             | 20                             | 21                       | 24         | 14              | 10-140          |
| <b>Valine</b>           | <b>32</b>                | <b>45</b>                       | <b>57</b>                      | <b>458</b>               | <b>518</b> | <b>133</b>      | <b>74 - 321</b> |
| <b>Leucine</b>          | <b>15</b>                | <b>23</b>                       | <b>25</b>                      | <b>270</b>               | <b>236</b> | <b>29</b>       | <b>49 - 216</b> |
| <b>Isoleucine</b>       | <b>9</b>                 | <b>14</b>                       | <b>16</b>                      | <b>315</b>               | <b>248</b> | <b>21</b>       | <b>22 -107</b>  |

## References

1. R. Tuchman, I. Rapin, Epilepsy in autism. *Lancet Neurol.* **1**, 352 (2002). [doi:10.1016/S1474-4422\(02\)00160-6](https://doi.org/10.1016/S1474-4422(02)00160-6) [Medline](#)
2. A. Bailey *et al.*, Autism as a strongly genetic disorder: evidence from a British twin study. *Psychol. Med.* **25**, 63 (1995). [doi:10.1017/S0033291700028099](https://doi.org/10.1017/S0033291700028099) [Medline](#)
3. D. Seelow, M. Schuelke, F. Hildebrandt, P. Nürnberg, HomozygosityMapper—an interactive approach to homozygosity mapping. *Nucleic Acids Res.* **37**, W593 (2009). [doi:10.1093/nar/gkp369](https://doi.org/10.1093/nar/gkp369) [Medline](#)
4. M. Machius, J. L. Chuang, R. M. Wynn, D. R. Tomchick, D. T. Chuang, Structure of rat BCKD kinase: Nucleotide-induced domain communication in a mitochondrial protein kinase. *Proc. Natl. Acad. Sci. U.S.A.* **98**, 11218 (2001). [doi:10.1073/pnas.201220098](https://doi.org/10.1073/pnas.201220098) [Medline](#)
5. R. A. Harris, M. Joshi, N. H. Jeoung, M. Obayashi, Overview of the molecular and biochemical basis of branched-chain amino acid catabolism. *J. Nutr.* **135** (suppl.), 1527S (2005). [Medline](#)
6. A. Suryawan *et al.*, A molecular model of human branched-chain amino acid metabolism. *Am. J. Clin. Nutr.* **68**, 72 (1998). [Medline](#)
7. J. H. Menkes, P. L. Hurst, J. M. Craig, A new syndrome: Progressive familial infantile cerebral dysfunction associated with an unusual urinary substance. *Pediatrics* **14**, 462 (1954). [Medline](#)
8. S. E. Snyderman, P. M. Norton, E. Roitman, L. E. Holt, Jr., Maple syrup urine disease, with particular reference to dietotherapy. *Pediatrics* **34**, 454 (1964). [Medline](#)
9. C. B. Doering, C. Coursey, W. Spangler, D. J. Danner, Murine branched chain alpha-ketoacid dehydrogenase kinase; cDNA cloning, tissue distribution, and temporal expression during embryonic development. *Gene* **212**, 213 (1998). [doi:10.1016/S0378-1119\(98\)00182-6](https://doi.org/10.1016/S0378-1119(98)00182-6) [Medline](#)
10. C. J. Lynch *et al.*, Potential role of leucine metabolism in the leucine-signaling pathway involving mTOR. *Am. J. Physiol. Endocrinol. Metab.* **285**, E854 (2003). [Medline](#)

11. M. A. Joshi *et al.*, Impaired growth and neurological abnormalities in branched-chain alpha-keto acid dehydrogenase kinase-deficient mice. *Biochem. J.* **400**, 153 (2006).  
[doi:10.1042/BJ20060869](https://doi.org/10.1042/BJ20060869) [Medline](#)
12. N. Lepage, N. McDonald, L. Dallaire, M. Lambert, Age-specific distribution of plasma amino acid concentrations in a healthy pediatric population. *Clin. Chem.* **43**, 2397 (1997).  
[Medline](#)
13. K. Okita *et al.*, A more efficient method to generate integration-free human iPS cells. *Nat. Methods* **8**, 409 (2011). [doi:10.1038/nmeth.1591](https://doi.org/10.1038/nmeth.1591) [Medline](#)
14. S. H. Yuan *et al.*, Cell-surface marker signatures for the isolation of neural stem cells, glia and neurons derived from human pluripotent stem cells. *PLoS ONE* **6**, e17540 (2011).  
[doi:10.1371/journal.pone.0017540](https://doi.org/10.1371/journal.pone.0017540) [Medline](#)
15. H. T. Chao *et al.*, Dysfunction in GABA signalling mediates autism-like stereotypies and Rett syndrome phenotypes. *Nature* **468**, 263 (2010). [doi:10.1038/nature09582](https://doi.org/10.1038/nature09582) [Medline](#)
16. M. J. Schmeisser *et al.*, Autistic-like behaviours and hyperactivity in mice lacking ProSAP1/Shank2. *Nature* **486**, 256 (2012). [Medline](#)
17. R. A. Hawkins, R. L. O’Kane, I. A. Simpson, J. R. Viña, Structure of the blood-brain barrier and its role in the transport of amino acids. *J. Nutr.* **136**, (Suppl), 218S (2006). [Medline](#)
18. R. Duelli, B. E. Enerson, D. Z. Gerhart, L. R. Drewes, Expression of large amino acid transporter LAT1 in rat brain endothelium. *J. Cereb. Blood Flow Metab.* **20**, 1557 (2000).  
[doi:10.1097/00004647-200011000-00005](https://doi.org/10.1097/00004647-200011000-00005) [Medline](#)
19. C. A. Wagner, F. Lang, S. Bröer, Function and structure of heterodimeric amino acid transporters. *Am. J. Physiol. Cell Physiol.* **281**, C1077 (2001). [Medline](#)
20. F. Verrey, System L: Heteromeric exchangers of large, neutral amino acids involved in directional transport. *Pflugers Arch.* **445**, 529 (2003). [Medline](#)
21. W. J. Zinnanti *et al.*, Dual mechanism of brain injury and novel treatment strategy in maple syrup urine disease. *Brain* **132**, 903 (2009). [doi:10.1093/brain/awp024](https://doi.org/10.1093/brain/awp024) [Medline](#)

22. K. Hoffmann, T. H. Lindner, easyLINKAGE-Plus—automated linkage analyses using large-scale SNP data. *Bioinformatics* **21**, 3565 (2005). [doi:10.1093/bioinformatics/bti571](https://doi.org/10.1093/bioinformatics/bti571)  
[Medline](#)
23. A. Gnirke *et al.*, Solution hybrid selection with ultra-long oligonucleotides for massively parallel targeted sequencing. *Nat. Biotechnol.* **27**, 182 (2009). [doi:10.1038/nbt.1523](https://doi.org/10.1038/nbt.1523)  
[Medline](#)
24. M. A. DePristo *et al.*, A framework for variation discovery and genotyping using next-generation DNA sequencing data. *Nat. Genet.* **43**, 491 (2011). [doi:10.1038/ng.806](https://doi.org/10.1038/ng.806)  
[Medline](#)
25. T. D. Schmittgen, K. J. Livak, Analyzing real-time PCR data by the comparative C(T) method. *Nat. Protoc.* **3**, 1101 (2008). [doi:10.1038/nprot.2008.73](https://doi.org/10.1038/nprot.2008.73) [Medline](#)
26. M. C. Marchetto *et al.*, A model for neural development and treatment of Rett syndrome using human induced pluripotent stem cells. *Cell* **143**, 527 (2010).  
[doi:10.1016/j.cell.2010.10.016](https://doi.org/10.1016/j.cell.2010.10.016) [Medline](#)
27. *Diagnostic and Statistical Manual of Mental Disorders* (American Psychiatric Association, Arlington, VA, ed. 4, 2000).
28. C. Lord, M. Rutter, A. Le Couteur, Autism Diagnostic Interview—Revised: A revised version of a diagnostic interview for caregivers of individuals with possible pervasive developmental disorders. *J. Autism Dev. Disord.* **24**, 659 (1994).  
[doi:10.1007/BF02172145](https://doi.org/10.1007/BF02172145) [Medline](#)
29. E. Schopler, R. J. Reichler, B. R. Renner, *The Childhood Autism Rating Scale (Cars) for Diagnostic Screening and Classification of Autism* (Irvington, New York, 1986).
30. C. Lord *et al.*, The Autism Diagnostic Observation Schedule—Generic: A standard measure of social and communication deficits associated with the spectrum of autism. *J. Autism Dev. Disord.* **30**, 205 (2000). [doi:10.1023/A:1005592401947](https://doi.org/10.1023/A:1005592401947) [Medline](#)
31. E. Shapira, M. G. Blitzer, J. B. Miller, D. K. Affrick, *Biochemical Genetics: A Laboratory Manual* (Oxford Univ. Press, Oxford, 1989).

32. N. Blau, M. Duran, M. K. Gibson, *Laboratory Guide to the Methods in Biochemical Genetics* (Springer, New York, ed. 1, 2008).
